# Supplementary material for: Dinitrogen activation by a titanium hydride complex supported by 2-butene ligand
Source: Royal Society of Chemistry journal article supplement (doi:10.1039/d3qi01911j), 2023-11-09
Supplement: d3qi01911j1.pdf [file d3qi01911j1.pdf]

## **Dinitrogen Activation by Titanium Hydride Complex Supported by 2-Butene Ligand**

Xianghui Shi,<sup>a</sup> Yongliang Zhang,<sup>a</sup> Mingdong Zhong,<sup>a</sup> Rui Feng,<sup>a</sup> Yuanjin Chen,<sup>a</sup> Lei Yu,<sup>a</sup> Yue Wu,<sup>a</sup> Junnian Wei\*<sup>a</sup> and Zhenfeng Xi<sup>a,b</sup>

a. Beijing National Laboratory for Molecular Sciences (BNLMS), Key Laboratory of Bioorganic Chemistry and Molecular Engineering of Ministry of Education, College of Chemistry, Peking University, Beijing 100871, China.

Email: jnwei@pku.edu.cn

b. State Key Laboratory of Organometallic Chemistry, Shanghai Institute of Organic Chemistry, Shanghai, 200032, China.

## **Contents Page**

|                                           |     |
|-------------------------------------------|-----|
| 1. General Procedure for Protonation..... | S3  |
| 2. Copies of NMR Spectra.....             | S4  |
| 3. Copies of Raman Spectra.....           | S12 |
| 4. Copies of UV-vis Spectra .....         | S13 |
| 5. EPR Spectra.....                       | S15 |
| 6. Cyclic Voltammetry.....                | S16 |
| 7. X-ray Crystallographic Studies.....    | S17 |
| 8. Computational Details.....             | S25 |

## 1. General procedure for protonation

Under an atmosphere of dinitrogen, complex **5** (0.01 mmol), reductant  $\text{KC}_8$  and proton sources ( $[(\text{Ph}_2\text{NH}_2)(\text{OTf})]$ ,  $[\text{H}(\text{Et}_2\text{O})_2(\text{BAr}^{\text{F}}_4)]$  or  $[(\text{HPCy}_3)(\text{BF}_4)]$ ) were mixed in a 50 mL Schlenk flask at  $-78\text{ }^\circ\text{C}$ , and pre-cooled  $\text{Et}_2\text{O}$  (5 mL,  $-78\text{ }^\circ\text{C}$ ) was added. The mixture was stirred  $-78\text{ }^\circ\text{C}$  for 1 h. The resultant solution was warmed slowly to room temperature. After the solution was stirred for 1 h at room temperature,  $\text{HCl}$  (100 eq. 1 M in 1,4-Dioxane) was added. The resulting solvent was removed under reduced pressure and the residue was extracted with  $\text{H}_2\text{O}$  (10.0 mL). The amounts of  $\text{NH}_3$  and  $\text{N}_2\text{H}_4$  were determined by the indophenol method and the *p*-(dimethylamino)benzaldehyde method, respectively. The detail results were summarized in **Table S1**.

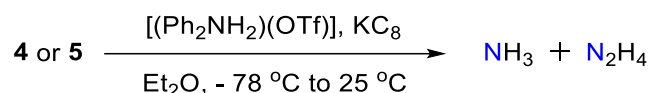

**Table S1:**  $\text{NH}_3$  and  $\text{N}_2\text{H}_4$  generation from complex **4** or **5**.<sup>a</sup>

| Run | Complex <sup>b</sup> | Solvent               | Reductant (eq.)     | Acid (eq.)                                                        | $\text{N}_2\text{H}_4$ (eq.) | $\text{NH}_3$ (eq.) |
|-----|----------------------|-----------------------|---------------------|-------------------------------------------------------------------|------------------------------|---------------------|
| 1   | <b>5</b>             | $\text{Et}_2\text{O}$ | $\text{KC}_8$ (0)   | $[(\text{Ph}_2\text{NH}_2)(\text{OTf})]$ (6)                      | 0.10                         | 0.43                |
| 2   | <b>5</b>             | $\text{Et}_2\text{O}$ | $\text{KC}_8$ (3)   | $[(\text{Ph}_2\text{NH}_2)(\text{OTf})]$ (6)                      | 0.07                         | 0.87                |
| 3   | <b>5</b>             | $\text{Et}_2\text{O}$ | $\text{KC}_8$ (6)   | $[(\text{Ph}_2\text{NH}_2)(\text{OTf})]$ (6)                      | 0.04                         | 0.41                |
| 4   | <b>5</b>             | $\text{Et}_2\text{O}$ | $\text{KC}_8$ (6)   | $[(\text{Ph}_2\text{NH}_2)(\text{OTf})]$ (12)                     | 0.22                         | 0.72                |
| 5   | <b>5</b>             | $\text{Et}_2\text{O}$ | $\text{KC}_8$ (18)  | $[(\text{Ph}_2\text{NH}_2)(\text{OTf})]$ (24)                     | 0.06                         | 0.55                |
| 6   | <b>4</b>             | $\text{Et}_2\text{O}$ | $\text{KC}_8$ (18)  | $[(\text{Ph}_2\text{NH}_2)(\text{OTf})]$ (24)                     | 0.21                         | 0.70                |
| 7   | <b>5</b>             | Toluene               | $\text{KC}_8$ (18)  | $[(\text{Ph}_2\text{NH}_2)(\text{OTf})]$ (24)                     | 0.05                         | 0.80                |
| 8   | <b>5</b>             | THF                   | $\text{KC}_8$ (18)  | $[(\text{Ph}_2\text{NH}_2)(\text{OTf})]$ (24)                     | 0.33                         | 0.88                |
| 9   | <b>5</b>             | $\text{Et}_2\text{O}$ | $\text{KC}_8$ (18)  | $[(\text{HPCy}_3)(\text{BF}_4)]$ (24)                             | 0.08                         | 0.23                |
| 10  | <b>5</b>             | $\text{Et}_2\text{O}$ | $\text{KC}_8$ (18)  | $[\text{H}(\text{Et}_2\text{O})_2(\text{BAr}^{\text{F}}_4)]$ (24) | 0.08                         | 0.29                |
| 11  | <b>5</b>             | $\text{Et}_2\text{O}$ | $\text{KC}_8$ (36)  | $[(\text{Ph}_2\text{NH}_2)(\text{OTf})]$ (42)                     | 0.06                         | 0.92                |
| 12  | <b>5</b>             | $\text{Et}_2\text{O}$ | $\text{KC}_8$ (54)  | $[(\text{Ph}_2\text{NH}_2)(\text{OTf})]$ (60)                     | 0.08                         | 1.77                |
| 13  | <b>4</b>             | $\text{Et}_2\text{O}$ | $\text{KC}_8$ (54)  | $[(\text{Ph}_2\text{NH}_2)(\text{OTf})]$ (60)                     | 0.16                         | 0.99                |
| 14  | <b>5</b>             | $\text{Et}_2\text{O}$ | $\text{KC}_8$ (72)  | $[(\text{Ph}_2\text{NH}_2)(\text{OTf})]$ (78)                     | 0.07                         | 1.85                |
| 15  | <b>5</b>             | $\text{Et}_2\text{O}$ | $\text{KC}_8$ (90)  | $[(\text{Ph}_2\text{NH}_2)(\text{OTf})]$ (96)                     | 0.08                         | 1.87                |
| 16  | <b>5</b>             | $\text{Et}_2\text{O}$ | $\text{KC}_8$ (108) | $[(\text{Ph}_2\text{NH}_2)(\text{OTf})]$ (114)                    | 0.09                         | 1.90                |

<sup>a</sup>All reactions were performed according to the above process. <sup>b</sup>10  $\mu\text{mol}$  complex **4** or **5** was used. <sup>c</sup>Yields per mol complex **4** or **5**.

## 2. Copies of NMR Spectra

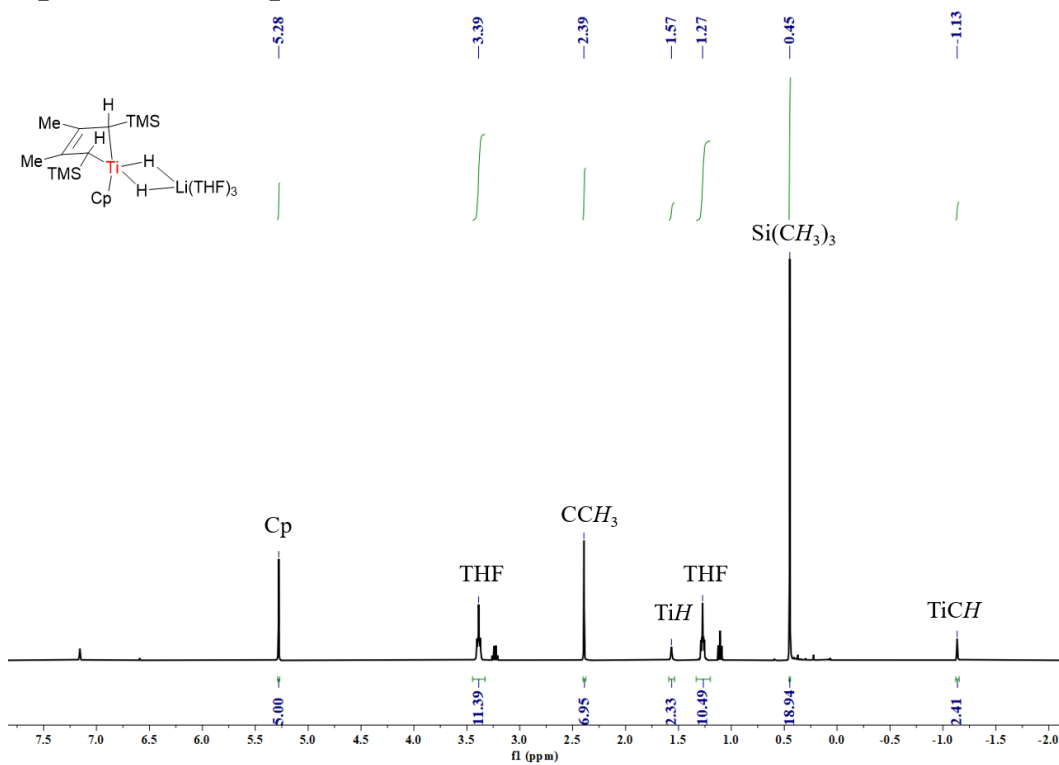

**Figure S1.**  $^1\text{H}$  NMR spectrum (400 MHz) of **2** in  $\text{C}_6\text{D}_6$  at 25 °C

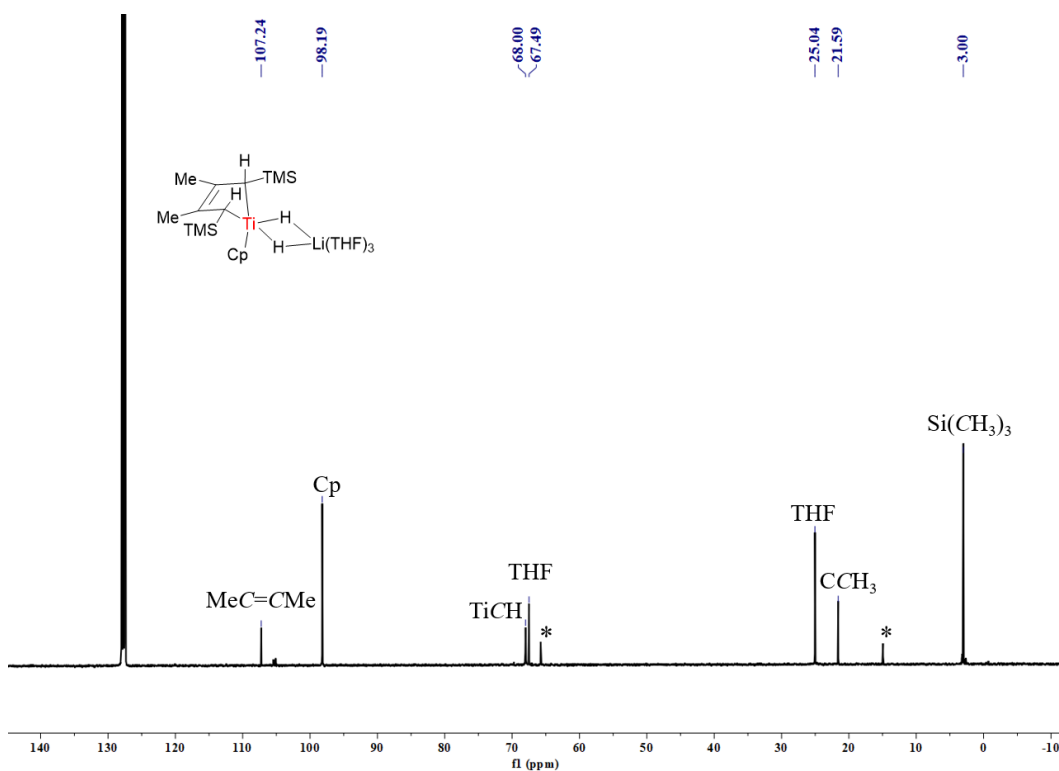

**Figure S2.**  $^{13}\text{C}\{^1\text{H}\}$  NMR spectrum (101 MHz) of **2** in  $\text{C}_6\text{D}_6$  at 25 °C (\* is  $\text{Et}_2\text{O}$ )

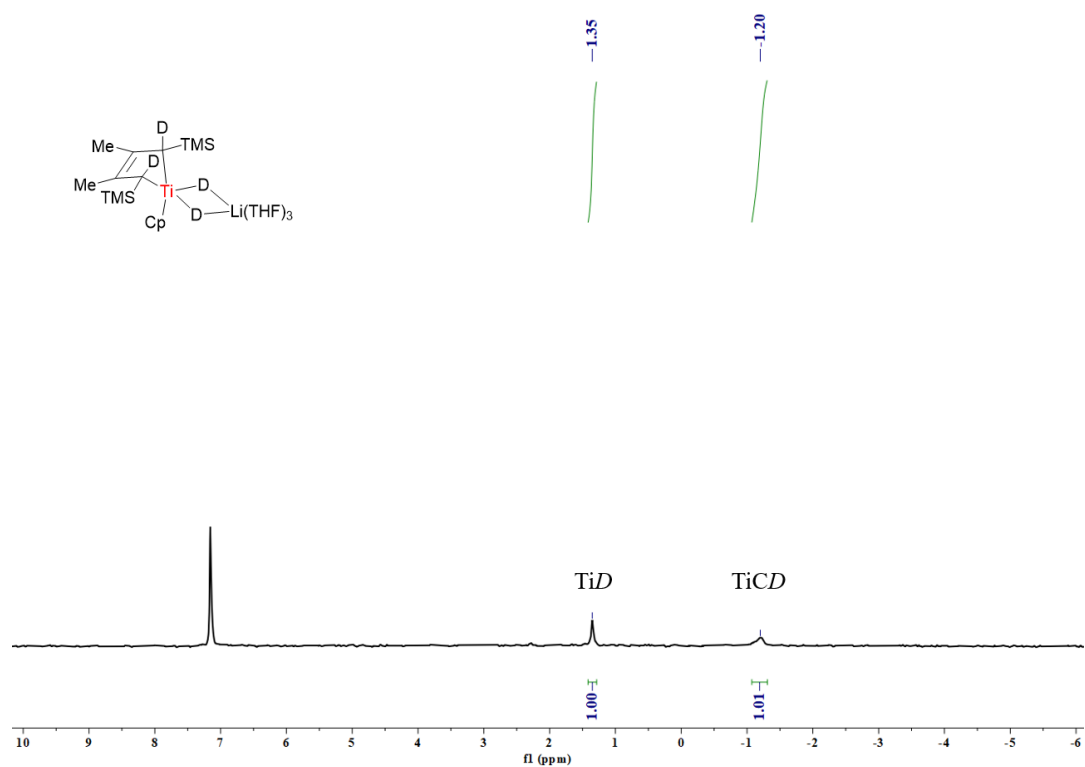

**Figure S3.**  $^2\text{H}$  NMR spectrum (77 MHz) of **2-D** in  $\text{C}_6\text{H}_6$  at 25 °C  
(Drops of  $\text{C}_6\text{D}_6$  were added as internal standard)

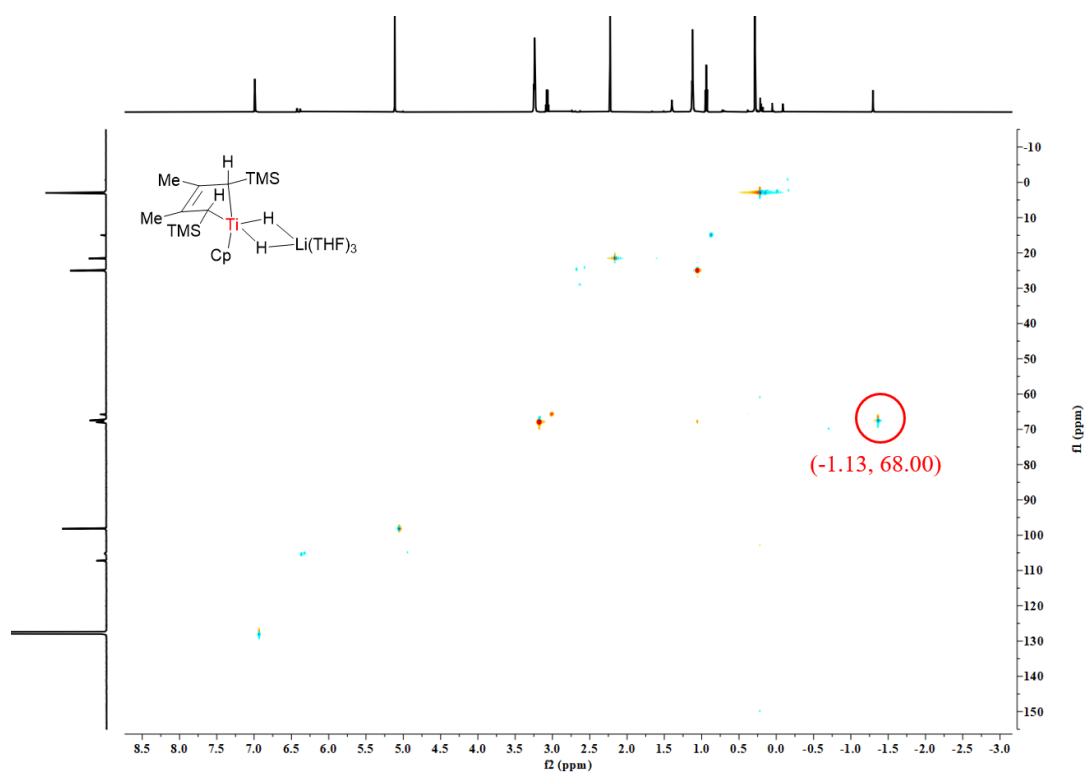

**Figure S4.**  $^1\text{H}$ - $^{13}\text{C}$  HSQC NMR spectrum (400 MHz) of **2** in  $\text{C}_6\text{D}_6$  at 25 °C  
(The singlet of proton signal at -1.13 ppm is assigned to Ti-CH)

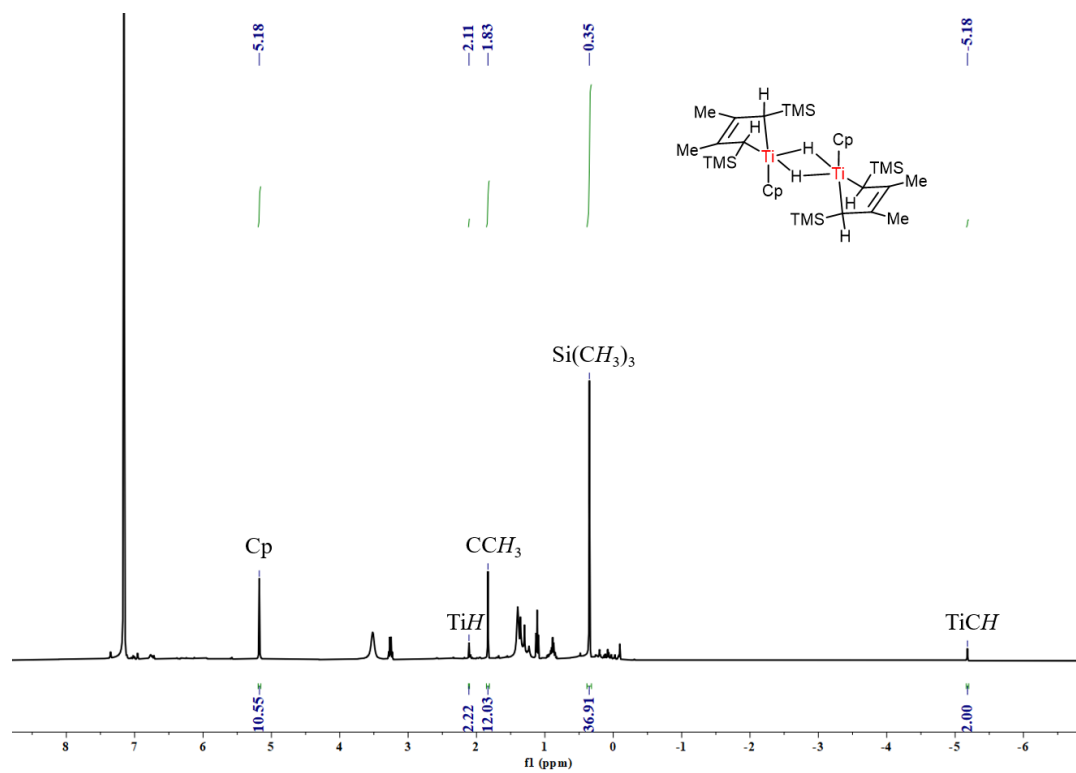

**Figure S5.**  $^1\text{H}$  NMR spectrum (400 MHz) of **3** in  $\text{C}_6\text{D}_6$  at 25 °C

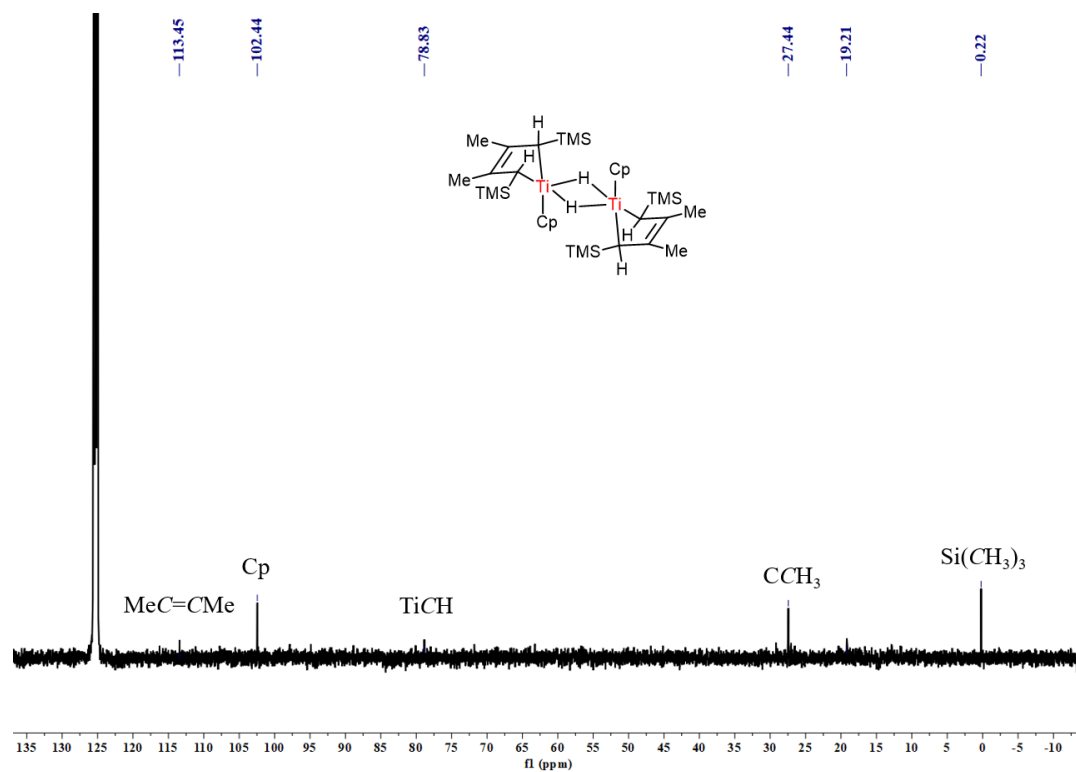

**Figure S6.**  $^{13}\text{C}\{^1\text{H}\}$  NMR spectrum (101 MHz) of **3** in  $\text{C}_6\text{D}_6$  at 25 °C

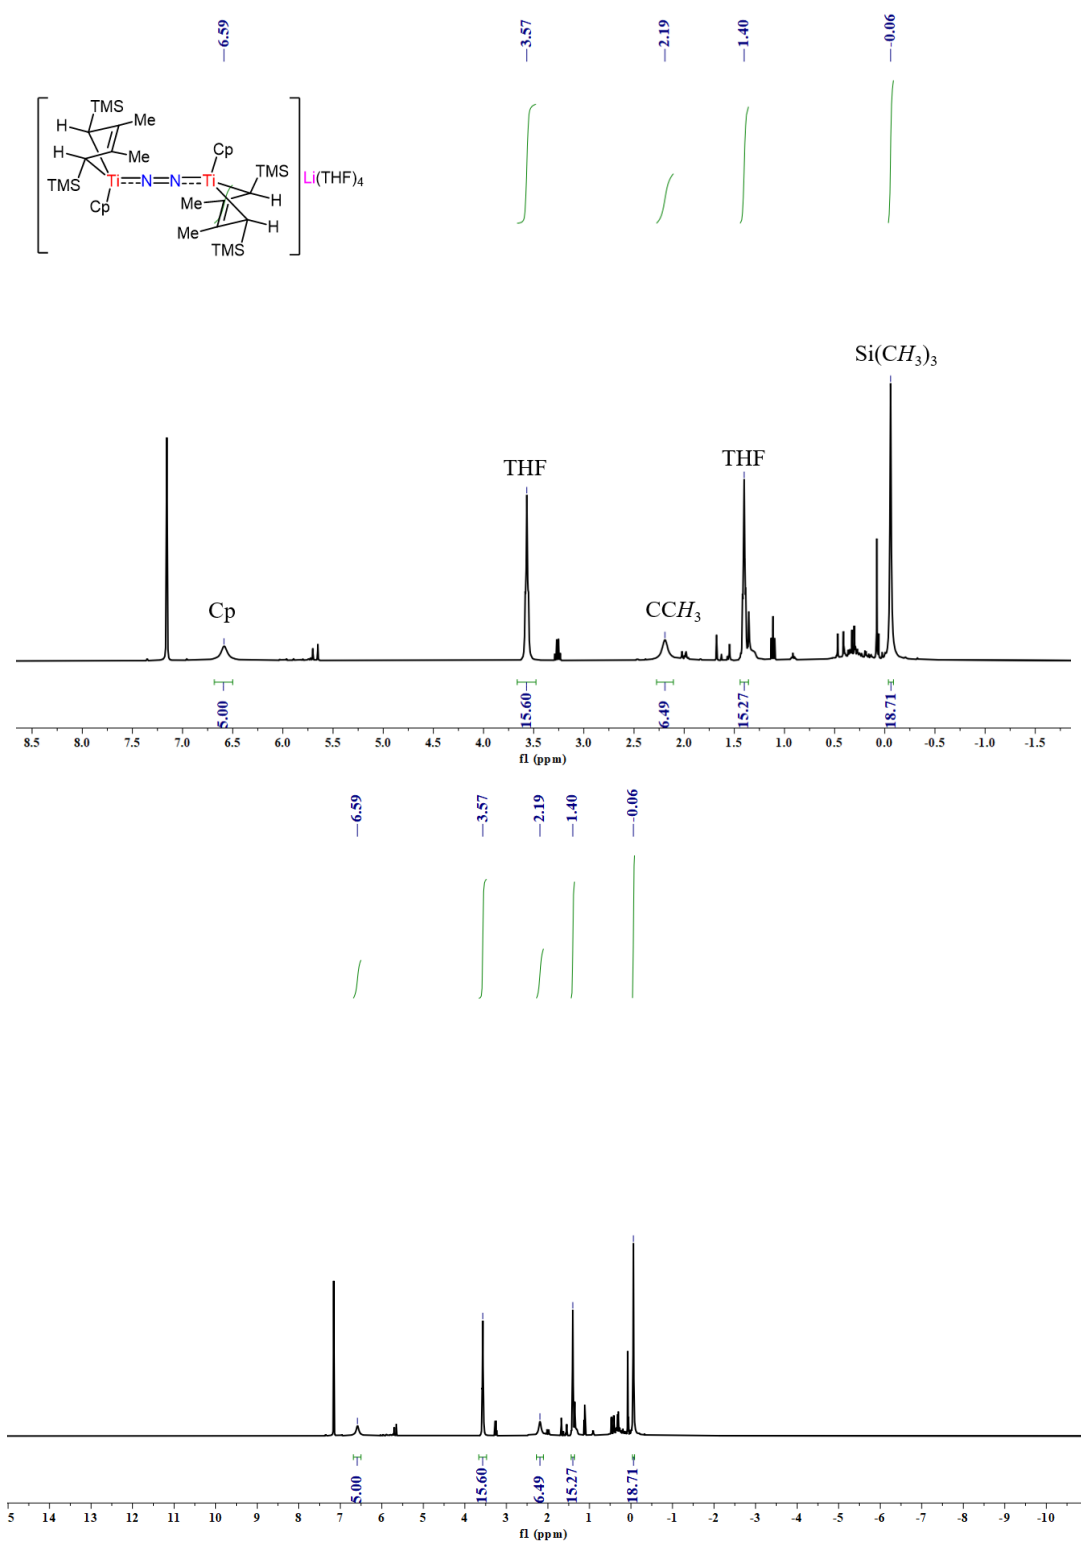

**Figure S7.** <sup>1</sup>H NMR spectrum (400 MHz) of **4** in C<sub>6</sub>D<sub>6</sub> at 25 °C

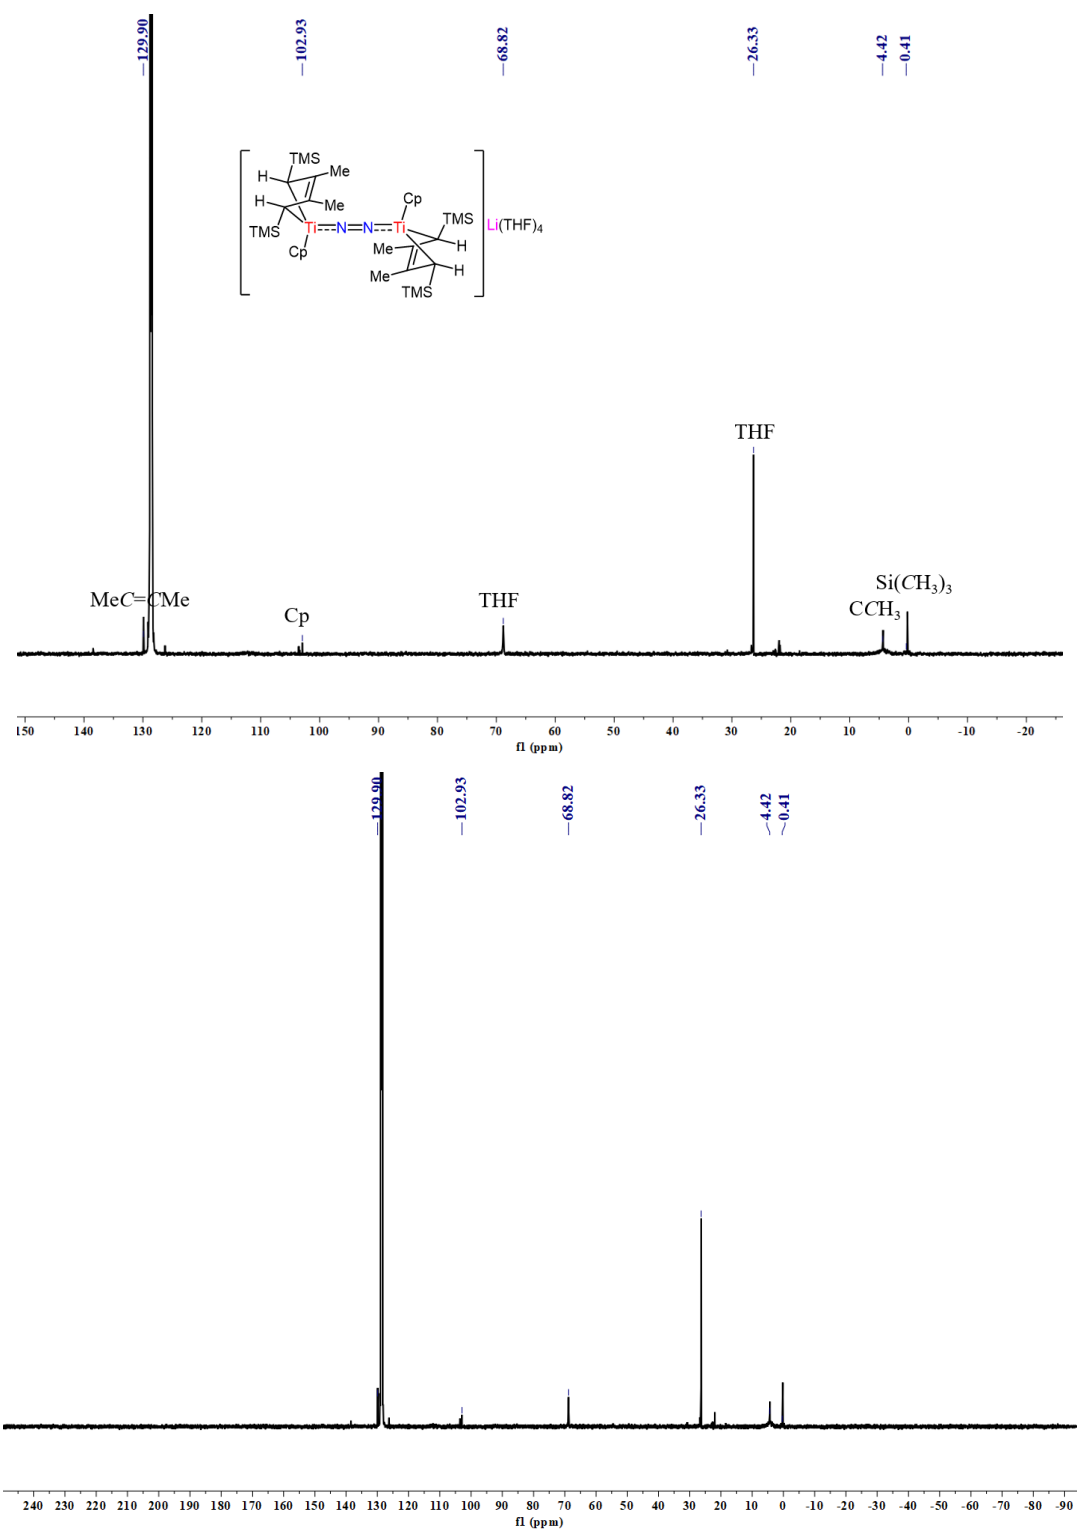

**Figure S8.** <sup>13</sup>C{<sup>1</sup>H} NMR spectrum (150 MHz) of **4** in C<sub>6</sub>D<sub>6</sub> at 25 °C



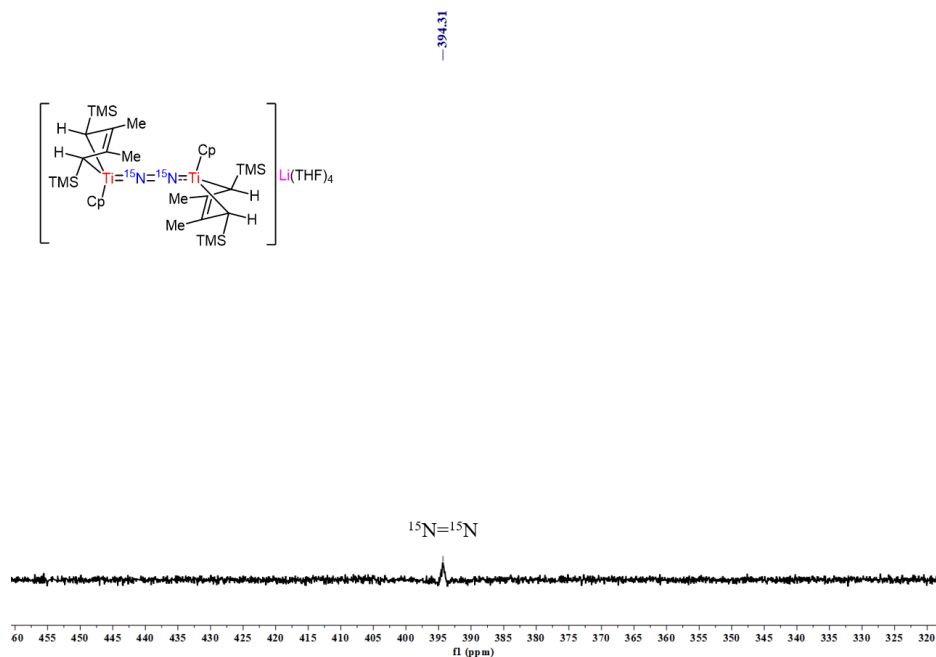

**Figure S9.**  $^{15}\text{N}$  NMR spectrum (61 MHz) of  $^{15}\text{N}$ -4 in  $\text{C}_6\text{D}_6$  at 25 °C

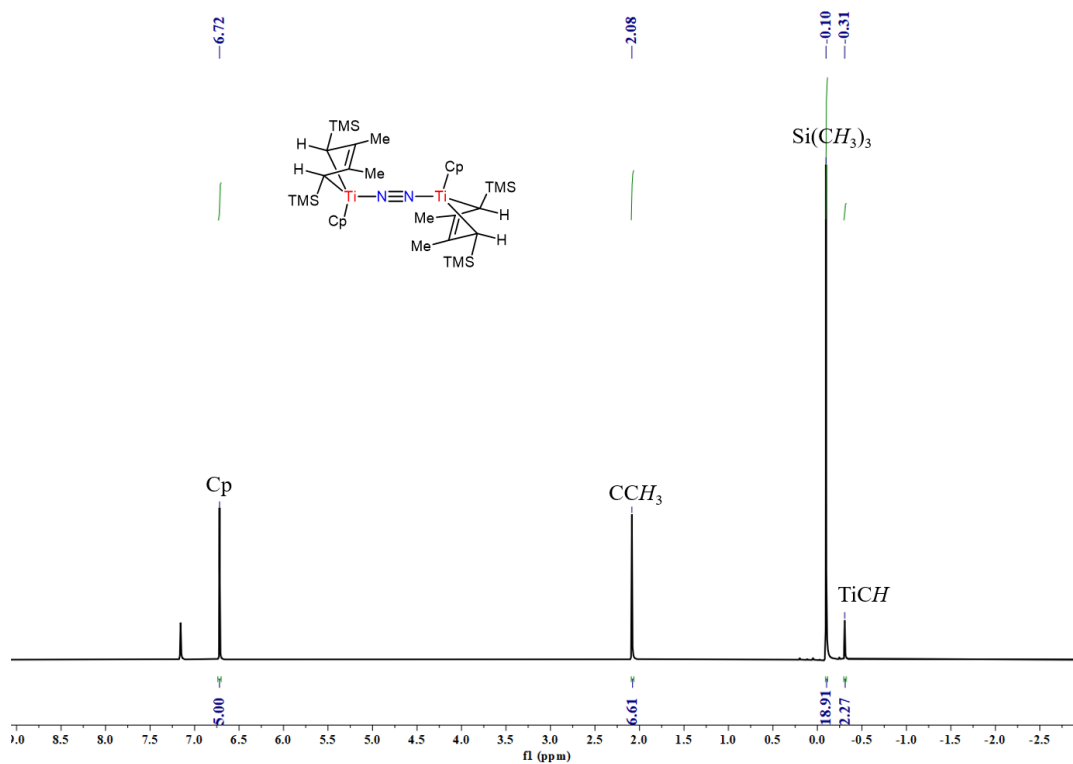

**Figure S10.**  $^1\text{H}$  NMR spectrum (400 MHz) of **5** in  $\text{C}_6\text{D}_6$  at 25 °C

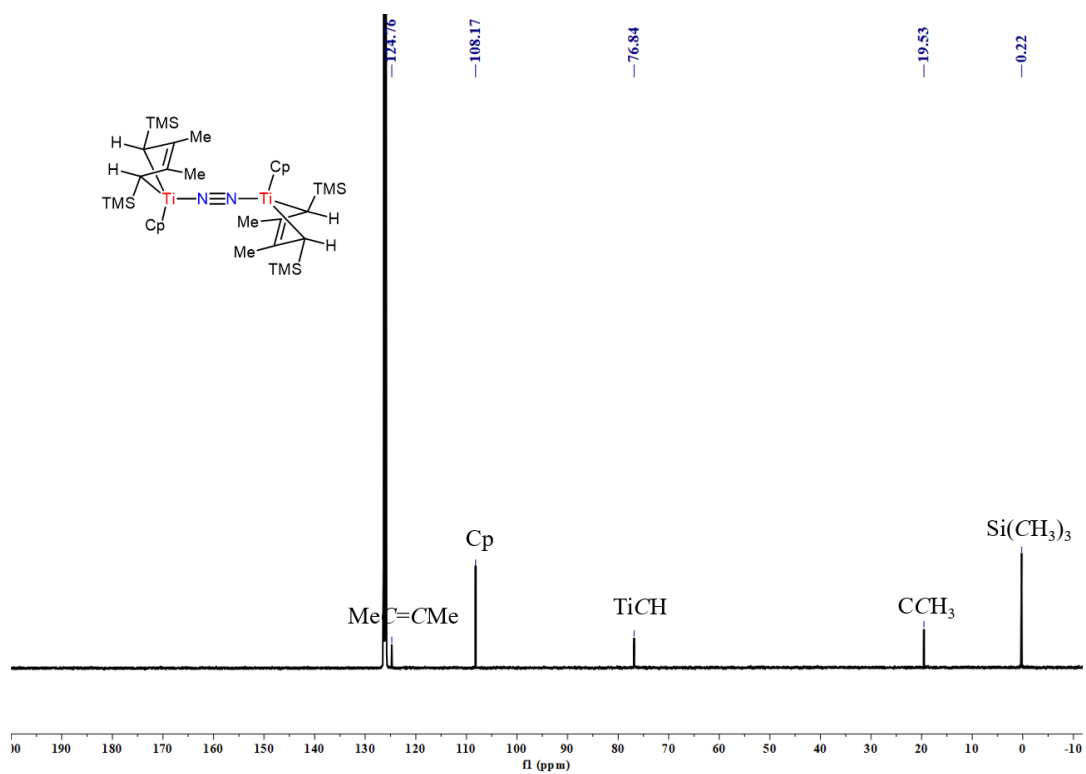

**Figure S11.**  $^{13}\text{C}\{^1\text{H}\}$  NMR spectrum (101 MHz) of **5** in  $\text{C}_6\text{D}_6$  at 25 °C

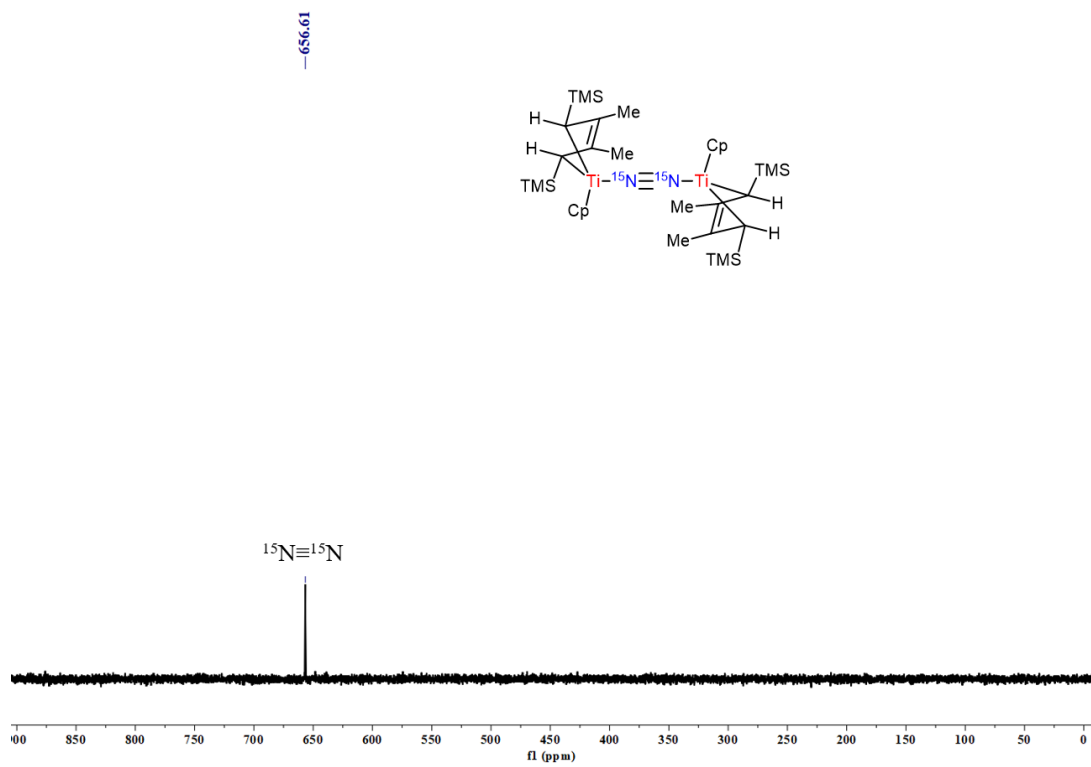

**Figure S12.**  $^{15}\text{N}$  NMR spectrum (61 MHz) of  $^{15}\text{N}$ -**5** in  $\text{C}_6\text{D}_6$  at 25 °C

Stability of complexes **2** and **3** in C<sub>6</sub>D<sub>6</sub> at room temperature:

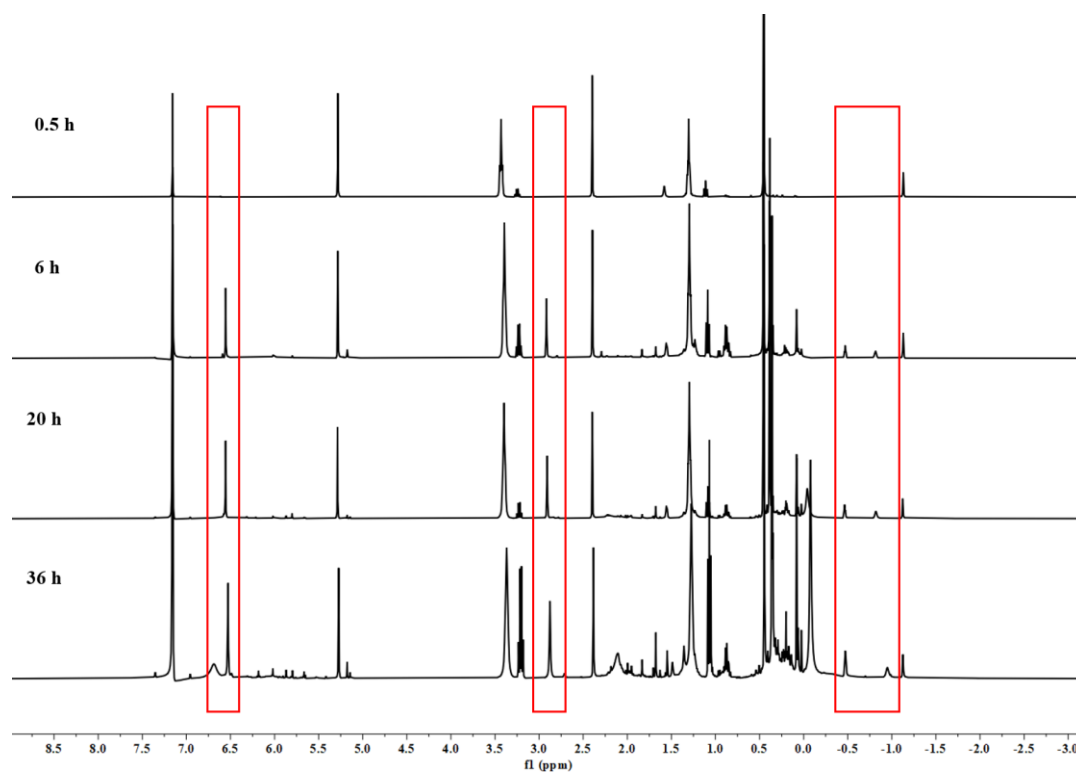

**Figure S13.** Stacked *in-situ* <sup>1</sup>H NMR spectra (400 MHz) of **2** in C<sub>6</sub>D<sub>6</sub> at different times with the generation of uncertain by-products

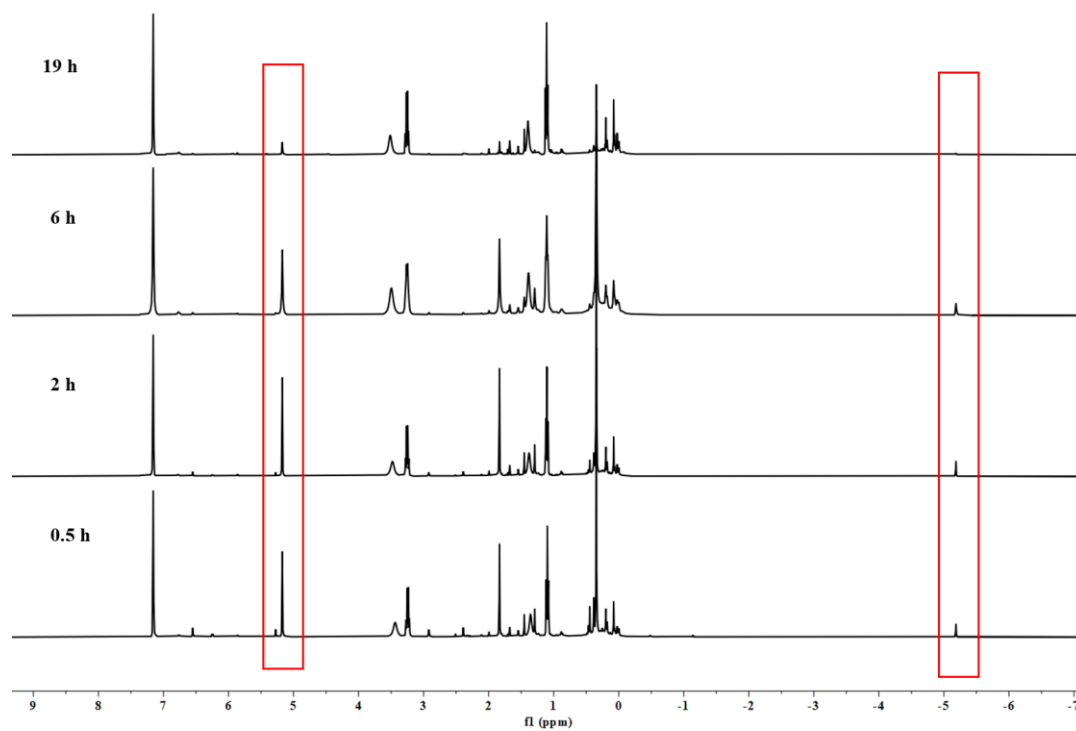

**Figure S14.** Stacked *in-situ* <sup>1</sup>H NMR spectra (400 MHz) of **3** in C<sub>6</sub>D<sub>6</sub> at different times with the disappearance of the product

### 3. Copies of Raman Spectra

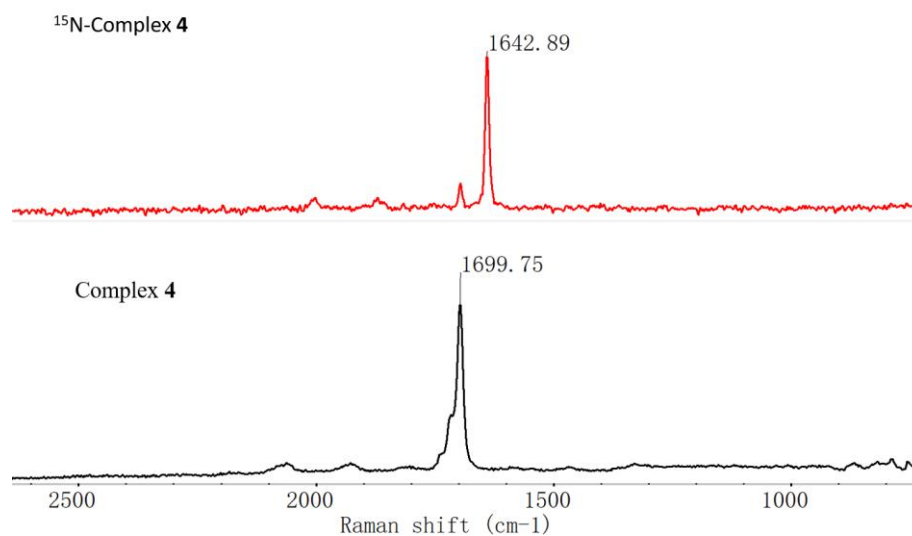

**Figure S15.** Select region of Raman spectra of crystal samples **4** (black line) and <sup>15</sup>**N-4** (red line) at room temperature in an argon atmosphere

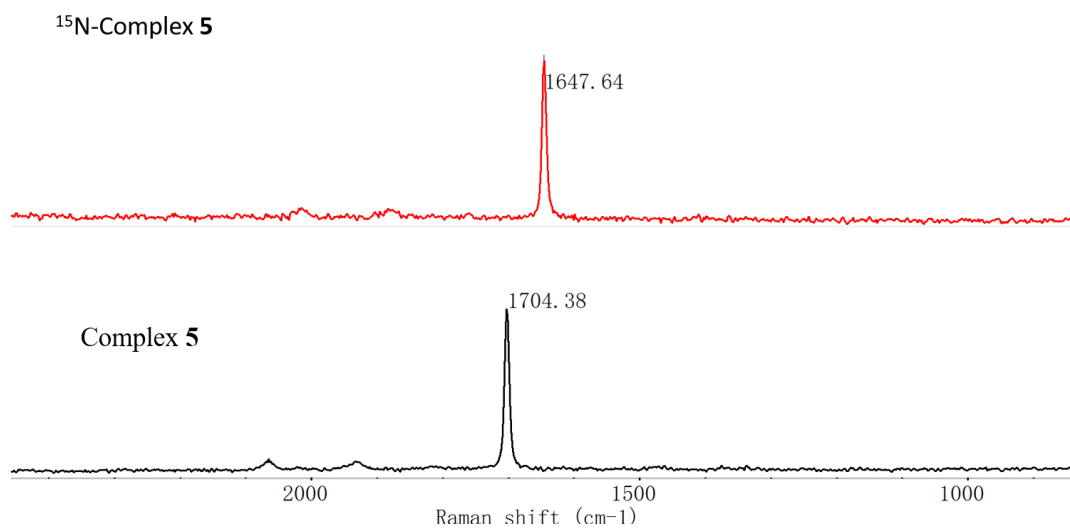

**Figure S16.** Select region of Raman spectra of crystal samples **5** (black line) and <sup>15</sup>**N-5** (red line) at room temperature in an argon atmosphere

#### 4. Copies of UV-vis Spectra

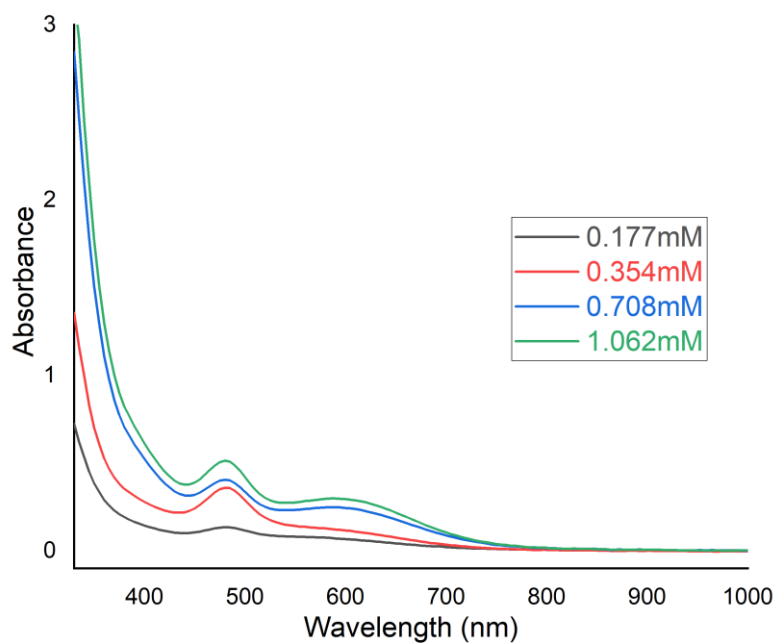

**Figure S17.** UV-vis spectra of **2** in 0.177-1.062 mM solutions in THF at room temperature

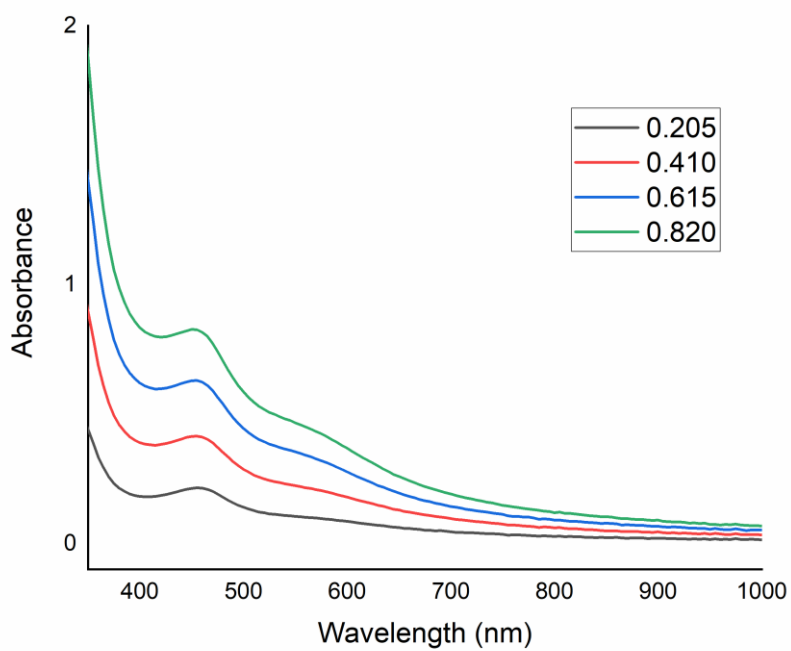

**Figure S18.** UV-vis spectra of **3** in 0.205-0.820 mM solutions in THF at room temperature

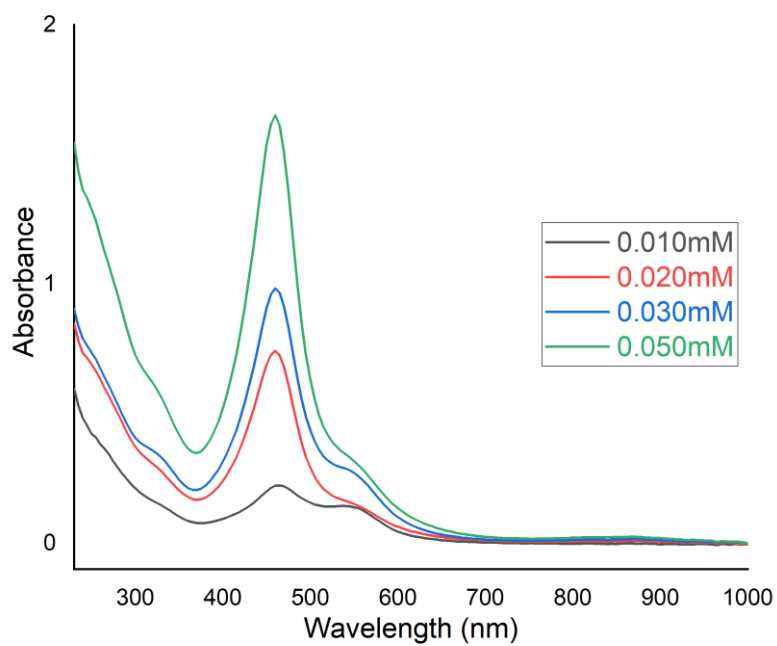

**Figure S19.** UV-vis spectra of **4** in 0.010-0.050 mM solutions in THF at room temperature

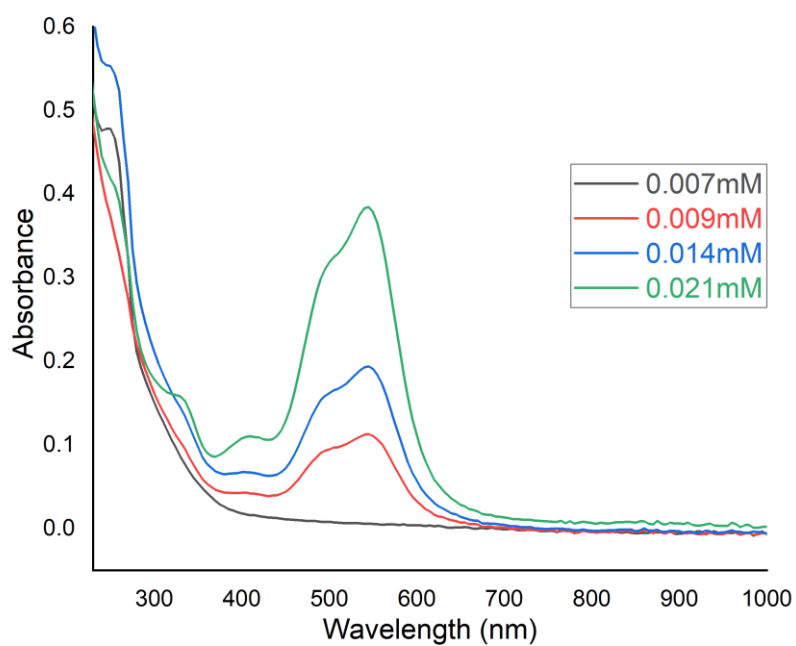

**Figure S20.** UV-vis spectra of **5** in 0.007-0.021 mM solutions in THF at room temperature

## 5. EPR Spectra

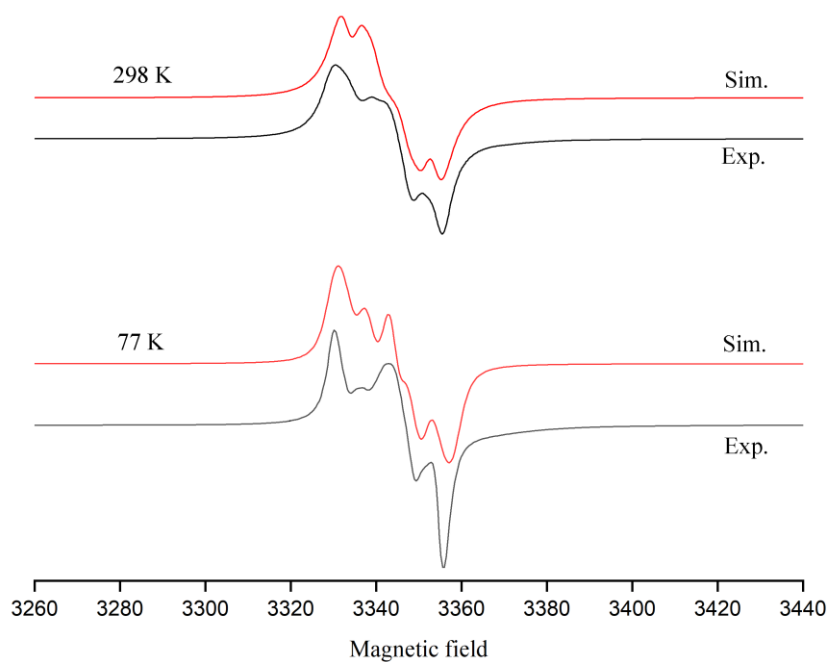

**Figure S21.** Experimental (black) and simulated (red) X-band EPR spectra of complex **4** recorded in toluene solution at 298 K (top) and 77 K (bottom).

EPR spectrum of **4** at 77 K is simulated by Easyspin with  $g = 2.006$ . The experimental spectrum does not show three equal-height peaks arising from the influence of a single nitrogen nucleus, indicating that two nitrogen nuclei have hyperfine interactions with unpaired electron. The spectrum also does not display five peaks with sequentially varying heights, suggesting that the strength of hyperfine interaction between the two nitrogen nuclei and electron is different. For the two nitrogen atoms, the hyperfine coupling constants are  $A1 = [15.21 \ 30.39 \ 7.32]$  and  $A2 = [8.65 \ 6.13 \ 18.84]$ , respectively.

## 6. Cyclic Voltammetry

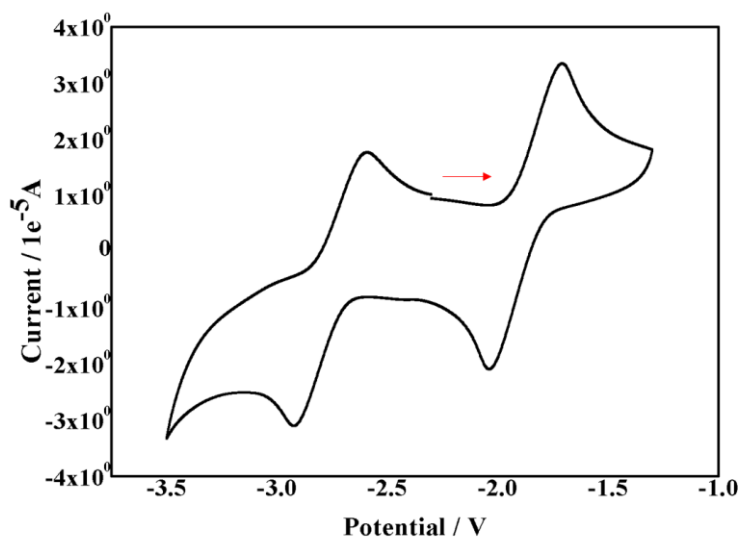

**Figure S22.** Cyclic voltammetry measurements of complex **4** (1 mM) at room temperature; recorded in THF under an N<sub>2</sub> atmosphere; [(<sup>n</sup>Bu<sub>4</sub>NPF<sub>6</sub>)] (0.1 M) as the supporting electrolyte. Two reversible one-electron events at  $E_{1/2} = -2.923$  V and -1.709 V at the beginning of the experiment.



## 7. X-ray Crystallographic Studies

**Table S2.** Crystal data and structure refinement for complex **2**

|                                             |                                                                                                |
|---------------------------------------------|------------------------------------------------------------------------------------------------|
| CCDC number                                 | 2284338                                                                                        |
| Empirical formula                           | C <sub>29</sub> H <sub>57</sub> O <sub>3</sub> Si <sub>2</sub> Li <sub>1</sub> Ti <sub>1</sub> |
| Formula weight                              | 564.76                                                                                         |
| Temperature/K                               | 179.99(10)                                                                                     |
| Crystal system                              | Triclinic                                                                                      |
| Space group                                 | P-1                                                                                            |
| a/Å                                         | 11.1236(6)                                                                                     |
| b/Å                                         | 12.2334(5)                                                                                     |
| c/Å                                         | 15.0490(6)                                                                                     |
| $\alpha$ /°                                 | 88.008(3)                                                                                      |
| $\beta$ /°                                  | 68.826(4)                                                                                      |
| $\gamma$ /°                                 | 64.750(4)                                                                                      |
| Volume/Å <sup>3</sup>                       | 1709.78(15)                                                                                    |
| Z                                           | 2                                                                                              |
| $\rho_{\text{calc}}$ , g/cm <sup>3</sup>    | 1.097                                                                                          |
| $\mu$ /mm <sup>-1</sup>                     | 0.345                                                                                          |
| F(000)                                      | 616.0                                                                                          |
| Crystal size/mm <sup>3</sup>                | 0.15 x 0.06 x 0.05                                                                             |
| Radiation                                   | MoK $\alpha$ ( $\lambda$ = 0.71073)                                                            |
| 2 $\theta$ range for data collection/°      | 4.238 to 54.97                                                                                 |
| Index ranges                                | -14 $\leq$ h $\leq$ 14, -15 $\leq$ k $\leq$ 15, -19 $\leq$ l $\leq$ 19                         |
| Reflections collected                       | 30506                                                                                          |
| Independent reflections                     | 7860 [ $R_{\text{int}}$ = 0.0244, $R_{\text{sigma}}$ = 0.0223]                                 |
| Data/restraints/parameters                  | 7860/904/469                                                                                   |
| Goodness-of-fit on F <sup>2</sup>           | 1.073                                                                                          |
| Final R indexes [ $I \geq 2\sigma(I)$ ]     | $R_1$ = 0.0469, $wR_2$ = 0.1282                                                                |
| Final R indexes [all data]                  | $R_1$ = 0.0551, $wR_2$ = 0.1338                                                                |
| Largest diff. peak/hole / e Å <sup>-3</sup> | 0.76/-0.43                                                                                     |

**Table S3.** Crystal data and structure refinement for complex **3**

|                                             |                                                                 |
|---------------------------------------------|-----------------------------------------------------------------|
| CCDC number                                 | 2284339                                                         |
| Empirical formula                           | C <sub>34</sub> H <sub>64</sub> Si <sub>4</sub> Ti <sub>2</sub> |
| Formula weight                              | 681.01                                                          |
| Temperature/K                               | 179.99(10)                                                      |
| Crystal system                              | Triclinic                                                       |
| Space group                                 | P-1                                                             |
| a/Å                                         | 10.1610(2)                                                      |
| b/Å                                         | 12.0365(2)                                                      |
| c/Å                                         | 15.9464(3)                                                      |
| $\alpha$ /°                                 | 90.1850(10)                                                     |
| $\beta$ /°                                  | 98.5710(10)                                                     |
| $\gamma$ /°                                 | 101.7520(10)                                                    |
| Volume/Å <sup>3</sup>                       | 1886.95(6)                                                      |
| Z                                           | 2                                                               |
| $\rho_{\text{calc}}$ , g/cm <sup>3</sup>    | 1.199                                                           |
| $\mu$ /mm <sup>-1</sup>                     | 0.571                                                           |
| F(000)                                      | 736.0                                                           |
| Crystal size/mm <sup>3</sup>                | 0.18 × 0.06 × 0.06                                              |
| Radiation                                   | MoK $\alpha$ ( $\lambda$ = 0.71073)                             |
| 2 $\theta$ range for data collection/°      | 4.818 to 54.968                                                 |
| Index ranges                                | -13 ≤ h ≤ 13, -15 ≤ k ≤ 15, -20 ≤ l ≤ 20                        |
| Reflections collected                       | 37148                                                           |
| Independent reflections                     | 8634 [R <sub>int</sub> = 0.0293, R <sub>sigma</sub> = 0.0236]   |
| Data/restraints/parameters                  | 8634/0/401                                                      |
| Goodness-of-fit on F <sup>2</sup>           | 1.042                                                           |
| Final R indexes [I ≥ 2 $\sigma$ (I)]        | R <sub>1</sub> = 0.0269, wR <sub>2</sub> = 0.0698               |
| Final R indexes [all data]                  | R <sub>1</sub> = 0.0323, wR <sub>2</sub> = 0.0727               |
| Largest diff. peak/hole / e Å <sup>-3</sup> | 0.37/-0.36                                                      |

**Table S4.** Crystal data and structure refinement for complex **4**

|                                             |                                                                                                               |
|---------------------------------------------|---------------------------------------------------------------------------------------------------------------|
| CCDC number                                 | 2284340                                                                                                       |
| Empirical formula                           | C <sub>50</sub> H <sub>94</sub> N <sub>2</sub> O <sub>4</sub> Si <sub>4</sub> Li <sub>1</sub> Ti <sub>2</sub> |
| Formula weight                              | 1002.37                                                                                                       |
| Temperature/K                               | 179.99(10)                                                                                                    |
| Crystal system                              | Triclinic                                                                                                     |
| Space group                                 | P-1                                                                                                           |
| a/Å                                         | 10.7595(3)                                                                                                    |
| b/Å                                         | 10.7982(2)                                                                                                    |
| c/Å                                         | 26.3640(7)                                                                                                    |
| α/°                                         | 80.790(2)                                                                                                     |
| β/°                                         | 84.849(2)                                                                                                     |
| γ/°                                         | 80.477(2)                                                                                                     |
| Volume/Å <sup>3</sup>                       | 2975.59(13)                                                                                                   |
| Z                                           | 2                                                                                                             |
| ρ <sub>calc</sub> , g/cm <sup>3</sup>       | 1.119                                                                                                         |
| μ/mm <sup>-1</sup>                          | 0.387                                                                                                         |
| F(000)                                      | 1086.0                                                                                                        |
| Crystal size/mm <sup>3</sup>                | 0.12 × 0.1 × 0.04                                                                                             |
| Radiation                                   | MoKα (λ = 0.71073)                                                                                            |
| 2θ range for data collection/°              | 4.606 to 54.968                                                                                               |
| Index ranges                                | -13 ≤ h ≤ 13, -14 ≤ k ≤ 14, -34 ≤ l ≤ 28                                                                      |
| Reflections collected                       | 37625                                                                                                         |
| Independent reflections                     | 13603 [R <sub>int</sub> = 0.0415, R <sub>sigma</sub> = 0.0620]                                                |
| Data/restraints/parameters                  | 13603/1052/800                                                                                                |
| Goodness-of-fit on F <sup>2</sup>           | 1.051                                                                                                         |
| Final R indexes [I ≥ 2σ (I)]                | R <sub>1</sub> = 0.0499, wR <sub>2</sub> = 0.1316                                                             |
| Final R indexes [all data]                  | R <sub>1</sub> = 0.0803, wR <sub>2</sub> = 0.1423                                                             |
| Largest diff. peak/hole / e Å <sup>-3</sup> | 0.53/-0.40                                                                                                    |

**Table S5.** Crystal data and structure refinement for complex **5**

|                                             |                                                                                |
|---------------------------------------------|--------------------------------------------------------------------------------|
| CCDC number                                 | 2284341                                                                        |
| Empirical formula                           | C <sub>34</sub> H <sub>62</sub> N <sub>2</sub> Si <sub>4</sub> Ti <sub>2</sub> |
| Formula weight                              | 707.01                                                                         |
| Temperature/K                               | 179.99(10)                                                                     |
| Crystal system                              | Monoclinic                                                                     |
| Space group                                 | I2/a                                                                           |
| a/Å                                         | 11.3116(4)                                                                     |
| b/Å                                         | 18.0476(6)                                                                     |
| c/Å                                         | 19.9174(6)                                                                     |
| $\alpha$ /°                                 | 90                                                                             |
| $\beta$ /°                                  | 91.779(3)                                                                      |
| $\gamma$ /°                                 | 90                                                                             |
| Volume/Å <sup>3</sup>                       | 4064.1(2)                                                                      |
| Z                                           | 4                                                                              |
| $\rho_{\text{calc}}$ , g/cm <sup>3</sup>    | 1.155                                                                          |
| $\mu$ /mm <sup>-1</sup>                     | 0.534                                                                          |
| F(000)                                      | 1520.0                                                                         |
| Crystal size/mm <sup>3</sup>                | 0.19 × 0.15 × 0.05                                                             |
| Radiation                                   | MoK $\alpha$ ( $\lambda$ = 0.71073)                                            |
| 2 $\theta$ range for data collection/°      | 4.238 to 54.97                                                                 |
| Index ranges                                | -14 ≤ h ≤ 12, -23 ≤ k ≤ 22, -25 ≤ l ≤ 25                                       |
| Reflections collected                       | 16160                                                                          |
| Independent reflections                     | 4660 [R <sub>int</sub> = 0.0191, R <sub>sigma</sub> = 0.0187]                  |
| Data/restraints/parameters                  | 4660/300/265                                                                   |
| Goodness-of-fit on F <sup>2</sup>           | 1.056                                                                          |
| Final R indexes [I ≥ 2 $\sigma$ (I)]        | R <sub>1</sub> = 0.0301, wR <sub>2</sub> = 0.0878                              |
| Final R indexes [all data]                  | R <sub>1</sub> = 0.0355, wR <sub>2</sub> = 0.0909                              |
| Largest diff. peak/hole / e Å <sup>-3</sup> | 0.42/-0.38                                                                     |

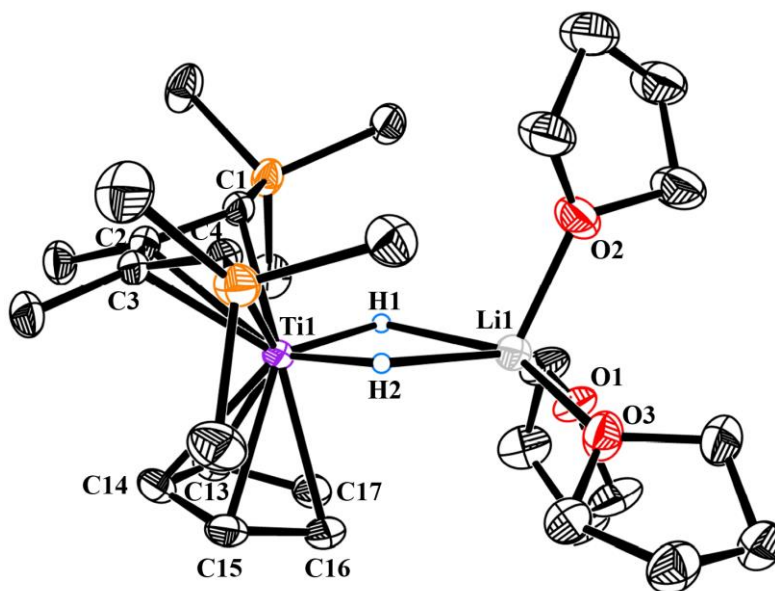

**Figure S23.** ORTEP plot (35% probability) of **2**. Except for the bridging hydrides (H1 and H2), all the hydrogen atoms are omitted for clarity. Selected interatomic distances [Å] and angles [deg]: Ti1–H1 1.70(2), Ti1–H2 1.65(4), Li1–H1 1.99(2), Li1–H2 1.96(3), Ti1–C1 2.254(2), Ti1–C2 2.317(2), Ti1–C3 2.316(2), Ti1–C4 2.254(2), Ti1–C13 2.370(5), Ti1–C14 2.372(5), Ti1–C15 2.385(4), Ti1–C16 2.391(4), Ti1–C17 2.382(3), Ti1–Cent1 2.051, C1–C2 1.438(3), C2–C3 1.408(3), C3–C4 1.439(3), H1–Ti1–H2 73(1).

Cent1: Centre of the Cp ring (C13~C17).

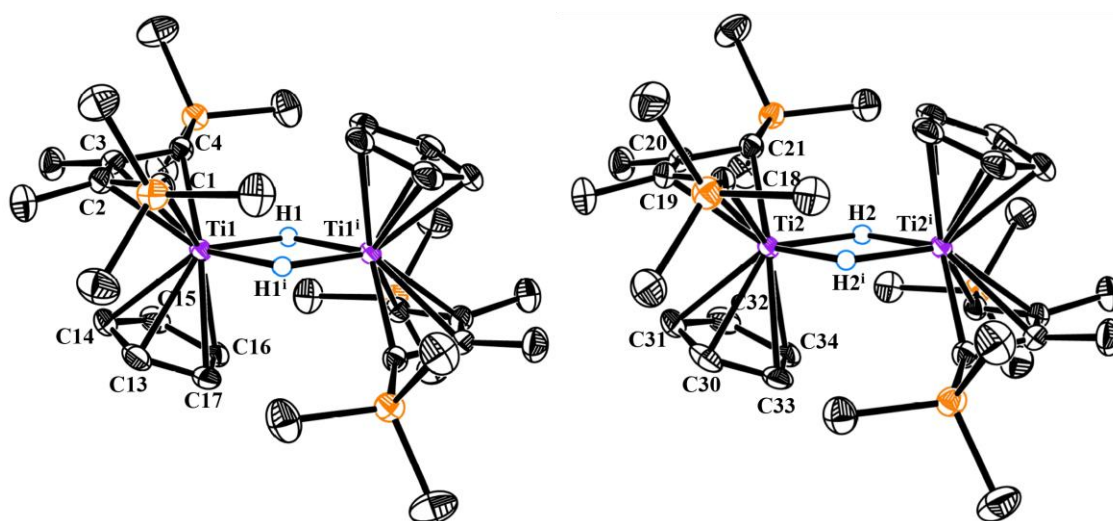

**Figure S24.** ORTEP plot (35% probability) of **3**. Except for the bridging hydrides (H1, H2, H1<sup>i</sup> and H2<sup>i</sup>), all the hydrogen atoms are omitted for clarity. Selected interatomic distances [Å] and angles [deg]: Ti1–H1 1.88(2), Ti1–H1<sup>i</sup> 1.87(2), Ti1–C1 2.218(1), Ti1–C2 2.376(1), Ti1–C3 2.374(1), Ti1–C4 2.223(1), Ti1–C13 2.352(2), Ti1–C14 2.351(2), Ti1–C15 2.358(2), Ti1–C16 2.393(1), Ti1–C17 2.390(1), Ti1–Cent1 2.044, C1–C2 1.444(2), C2–C3 1.412(2), C3–C4 1.439(2), H1–Ti1–H1<sup>i</sup> 65.3(8), Ti2–H2 1.83(2), Ti2–H2<sup>i</sup> 1.88(2), Ti2–C18 2.221(1), Ti2–C19 2.374(1), Ti2–C20 2.374(1), Ti2–C21 2.219(1), Ti2–C30 2.355(2), Ti2–C31 2.346(2), Ti2–C32 2.352(2), Ti2–C33 2.397(2), Ti2–C34 2.400(2), Ti2–Cent2 2.046, C18–C19 1.438(2), C19–C20 1.410(2), C20–C21 1.441(2), H2–Ti2–H2<sup>i</sup> 63.6(8).  
Cent1: Centre of the Cp ring (C13~C17), Cent2: Centre of the Cp ring (C30~C34).

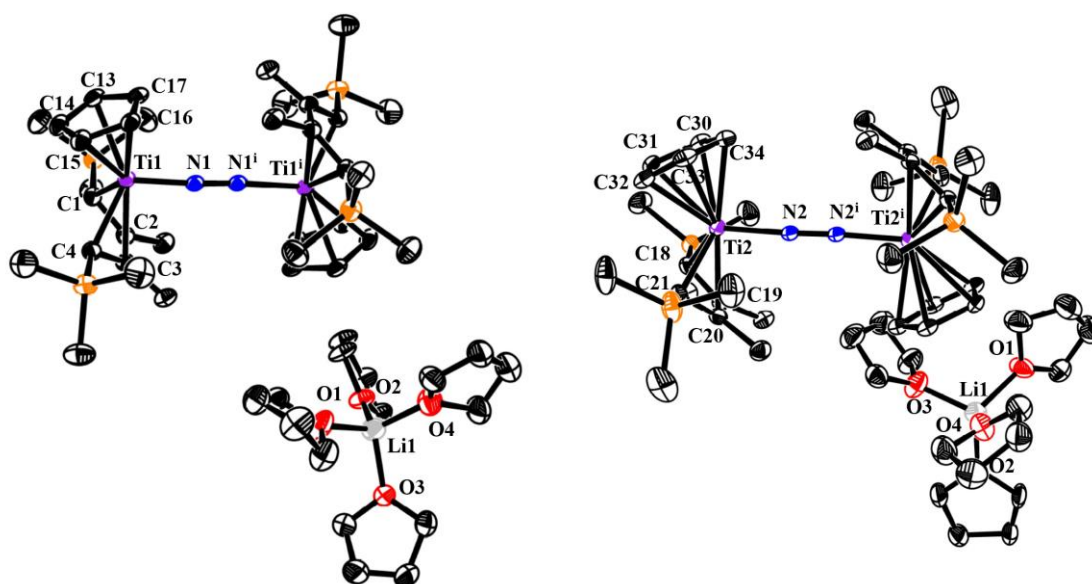

**Figure S25.** ORTEP plot (35% probability) of **4**. All the hydrogen atoms are omitted for clarity. Selected interatomic distances [ $\text{\AA}$ ] and angles [deg]: N1–N1<sup>i</sup> 1.198(2), Ti1–N1 1.903(2), Ti1–C1 2.229(2), Ti1–C2 2.314(2), Ti1–C3 2.324(2), Ti1–C4 2.237(2), Ti1–C13 2.41(2), Ti1–C14 2.42(2), Ti1–C15 2.43(2), Ti1–C16 2.39(2), Ti1–C17 2.40(2), Ti1–Cent1 2.098, C1–C2 1.448(3), C2–C3 1.403(3), C3–C4 1.443(3), Ti1–N1–N1<sup>i</sup> 176.3(2), N2–N2<sup>i</sup> 1.200(2), Ti2–N2 1.898(2), Ti2–C18 2.233(2), Ti2–C19 2.328(2), Ti2–C20 2.315(2), Ti2–C21 2.225(2), Ti2–C30 2.378(9), Ti2–C31 2.42(1), Ti2–C32 2.39(1), Ti2–C33 2.44(1), Ti2–C34 2.39(1), Ti2–Cent2 2.097, C18–C19 1.454(3), C19–C20 1.398(3), C20–C21 1.449(3), Ti2–N2–N2<sup>i</sup> 177.0(1).

Cent1: Centre of the Cp ring (C13~C17), Cent2: Centre of the Cp ring (C30~C34).

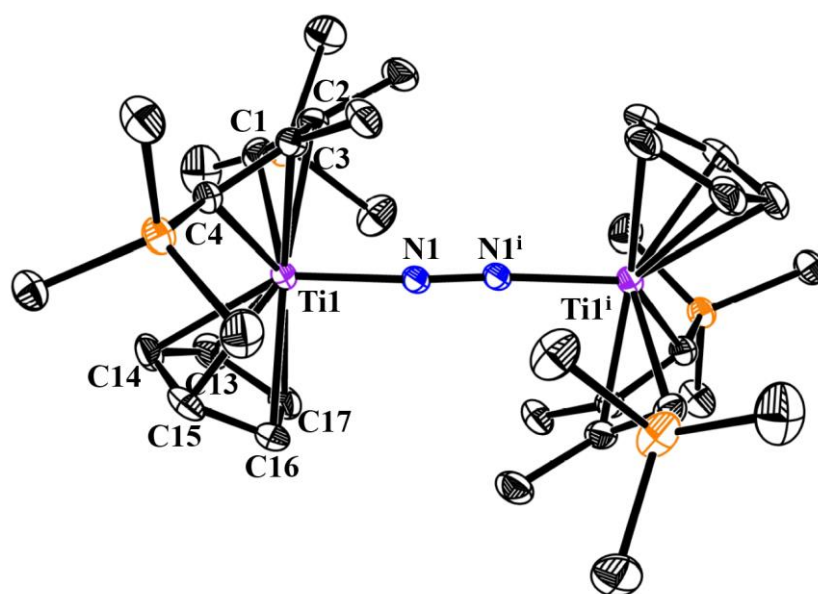

**Figure S26.** ORTEP plot (35% probability) of **5**. All the hydrogen atoms are omitted for clarity. Selected interatomic distances [Å] and angles [deg]: N1–N1<sup>i</sup> 1.179(2), Ti1–N1 1.945(1), Ti1–C1 2.199(1), Ti1–C2 2.296(1), Ti1–C3 2.294(1), Ti1–C4 2.196(1), Ti1–C13 2.41(1), Ti1–C14 2.38(1), Ti1–C15 2.40(2), Ti1–C16 2.37(2), Ti1–C17 2.40(1), Ti1–Cent1 2.050, C1–C2 1.448(2), C2–C3 1.414(2), C3–C4 1.441(2), Ti1–N1–N1<sup>i</sup> 175.9(1).

Cent1: Centre of the Cp ring (C13~C17).



## 8. Computational Details

DFT calculations were performed using ORCA 5.0.3. Geometric structures were optimized employing the r2SCAN-3c level of theory. Cartesian coordinates of the optimized geometry were provided as a separate .xyz file. FBO analysis was based on the optimized structures.

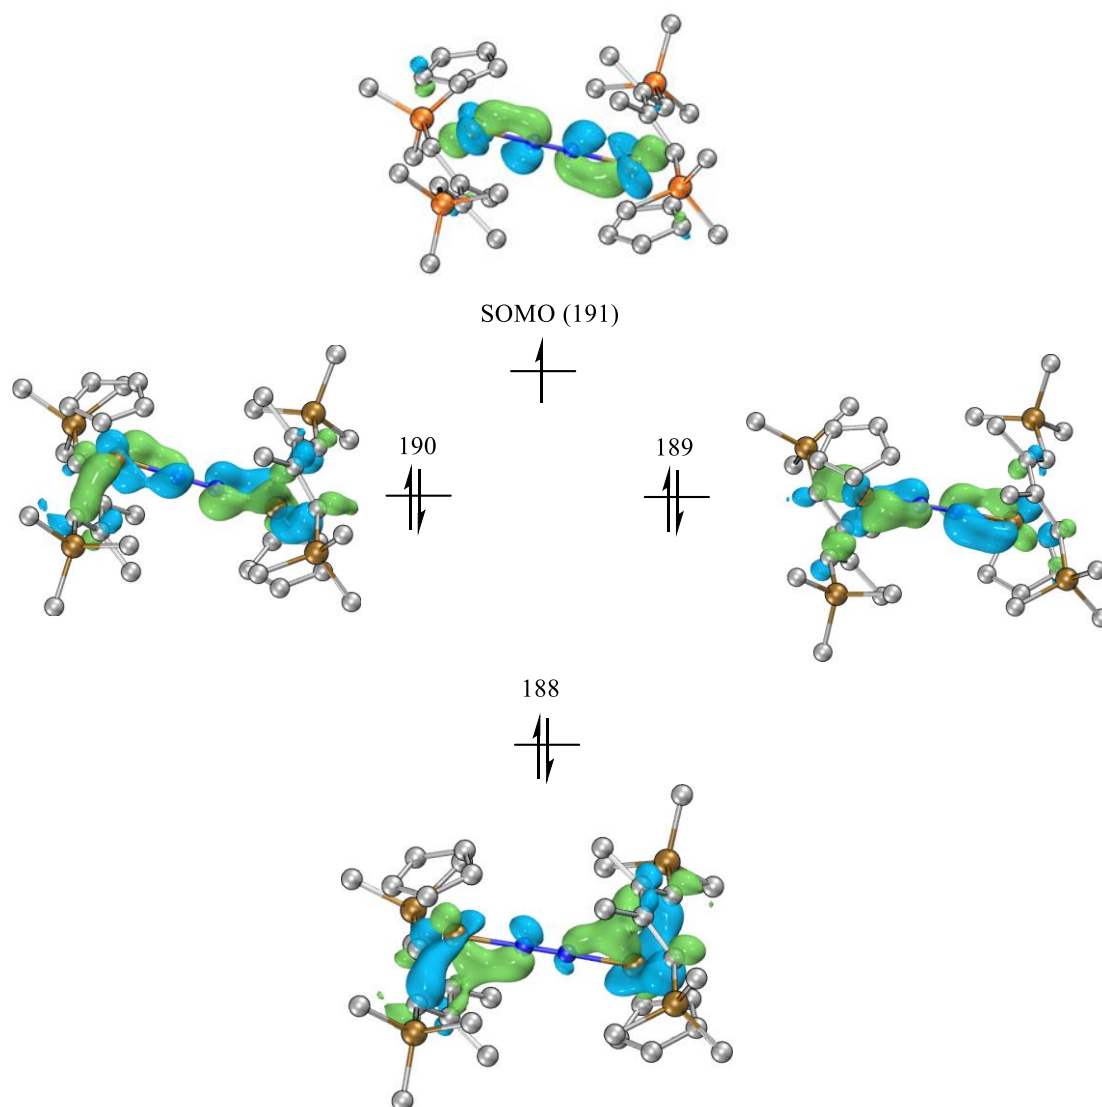

**Figure S27.** The selected molecular orbitals ( isovalue = 0.05 ) of complex **4**.

### Fuzzy atom bond order of complex 4

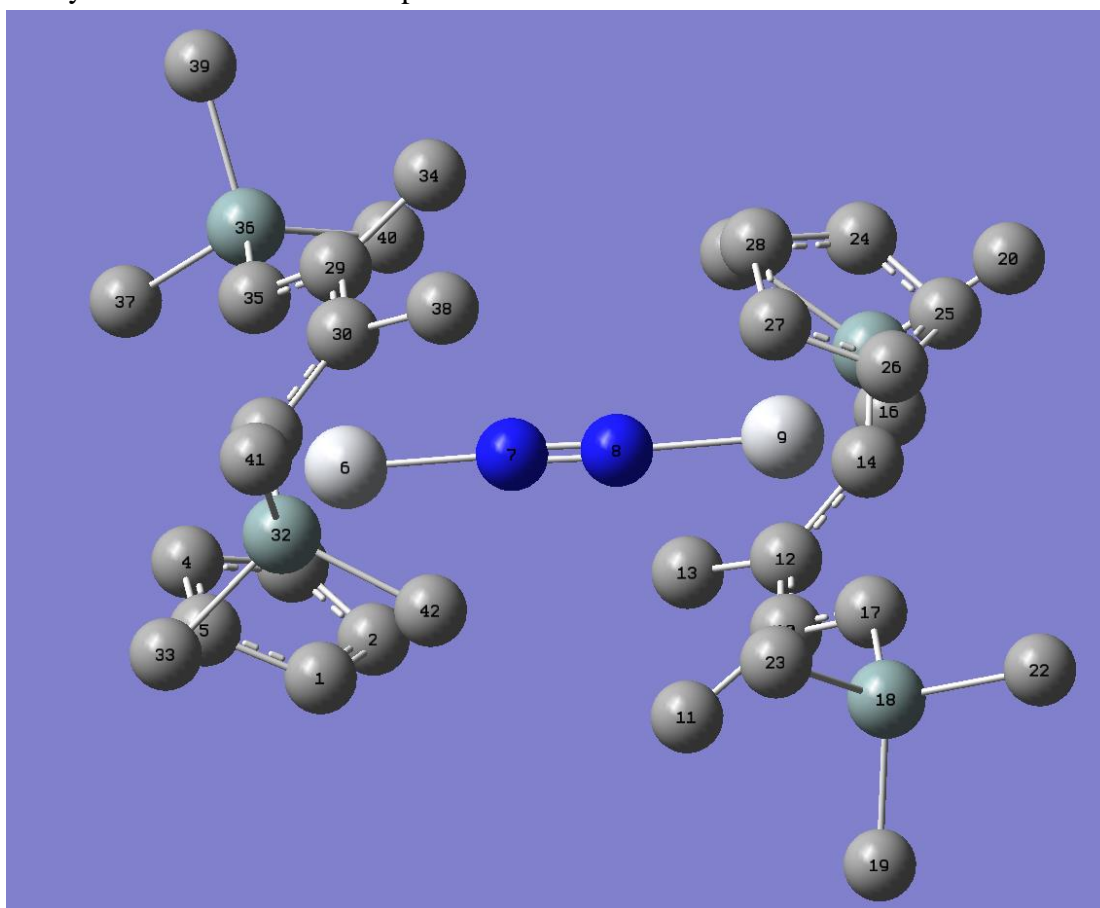

The total bond order  $\geq 0.050000$

|       |      |       |                 |                |                 |
|-------|------|-------|-----------------|----------------|-----------------|
| # 1:  | 1(C) | 2(C)  | Alpha: 0.584879 | Beta: 0.587071 | Total: 1.171950 |
| # 2:  | 1(C) | 3(C)  | Alpha: 0.049163 | Beta: 0.052355 | Total: 0.101517 |
| # 3:  | 1(C) | 4(C)  | Alpha: 0.053131 | Beta: 0.050614 | Total: 0.103745 |
| # 4:  | 1(C) | 5(C)  | Alpha: 0.580811 | Beta: 0.586574 | Total: 1.167385 |
| # 5:  | 1(C) | 6(Ti) | Alpha: 0.295847 | Beta: 0.289156 | Total: 0.585003 |
| # 6:  | 1(C) | 99(H) | Alpha: 0.430664 | Beta: 0.430098 | Total: 0.860761 |
| # 7:  | 2(C) | 3(C)  | Alpha: 0.590480 | Beta: 0.591598 | Total: 1.182078 |
| # 8:  | 2(C) | 4(C)  | Alpha: 0.051063 | Beta: 0.052611 | Total: 0.103674 |
| # 9:  | 2(C) | 5(C)  | Alpha: 0.051048 | Beta: 0.052320 | Total: 0.103368 |
| # 10: | 2(C) | 6(Ti) | Alpha: 0.290424 | Beta: 0.285957 | Total: 0.576381 |
| # 11: | 2(C) | 89(H) | Alpha: 0.420626 | Beta: 0.420504 | Total: 0.841130 |
| # 12: | 3(C) | 4(C)  | Alpha: 0.577822 | Beta: 0.586113 | Total: 1.163935 |

# 13: 3(C ) 5(C ) Alpha: 0.051764 Beta: 0.050927 Total: 0.102691  
 # 14: 3(C ) 6(Ti) Alpha: 0.298418 Beta: 0.290777 Total: 0.589194  
 # 15: 3(C ) 80(H ) Alpha: 0.428656 Beta: 0.428188 Total: 0.856844  
 # 16: 4(C ) 5(C ) Alpha: 0.610246 Beta: 0.598542 Total: 1.208788  
 # 17: 4(C ) 6(Ti) Alpha: 0.274645 Beta: 0.278650 Total: 0.553295  
 # 18: 4(C ) 82(H ) Alpha: 0.426971 Beta: 0.426479 Total: 0.853449  
 # 19: 5(C ) 6(Ti) Alpha: 0.278359 Beta: 0.281043 Total: 0.559401  
 # 20: 5(C ) 92(H ) Alpha: 0.424015 Beta: 0.423989 Total: 0.848003  
 # 21: 6(Ti) 7(N ) Alpha: 0.857907 Beta: 0.722527 Total: 1.580434  
 # 22: 6(Ti) 8(N ) Alpha: 0.129441 Beta: 0.095598 Total: 0.225039  
 # 23: 6(Ti) 9(Ti) Alpha: 0.274562 Beta: 0.130589 Total: 0.405151  
 # 24: 6(Ti) 29(C ) Alpha: 0.298614 Beta: 0.291001 Total: 0.589615  
 # 25: 6(Ti) 30(C ) Alpha: 0.301095 Beta: 0.297011 Total: 0.598106  
 # 26: 6(Ti) 31(C ) Alpha: 0.439227 Beta: 0.435270 Total: 0.874496  
 # 27: 6(Ti) 32(Si) Alpha: 0.070699 Beta: 0.069188 Total: 0.139887  
 # 28: 6(Ti) 35(C ) Alpha: 0.442562 Beta: 0.433853 Total: 0.876415  
 # 29: 6(Ti) 36(Si) Alpha: 0.070294 Beta: 0.067338 Total: 0.137632  
 # 30: 6(Ti) 72(H ) Alpha: 0.048387 Beta: 0.048703 Total: 0.097090  
 # 31: 6(Ti) 81(H ) Alpha: 0.041466 Beta: 0.042638 Total: 0.084104  
 # 32: 7(N ) 8(N ) Alpha: 0.926019 Beta: 1.037228 Total: 1.963247  
 # 33: 7(N ) 9(Ti) Alpha: 0.122015 Beta: 0.106072 Total: 0.228087  
 # 34: 8(N ) 9(Ti) Alpha: 0.849439 Beta: 0.742265 Total: 1.591704  
 # 35: 9(Ti) 10(C ) Alpha: 0.305886 Beta: 0.303769 Total: 0.609655  
 # 36: 9(Ti) 11(C ) Alpha: 0.025932 Beta: 0.025448 Total: 0.051380  
 # 37: 9(Ti) 12(C ) Alpha: 0.306397 Beta: 0.299834 Total: 0.606231  
 # 38: 9(Ti) 13(C ) Alpha: 0.025840 Beta: 0.025429 Total: 0.051268  
 # 39: 9(Ti) 14(C ) Alpha: 0.446898 Beta: 0.438770 Total: 0.885667  
 # 40: 9(Ti) 15(Si) Alpha: 0.072124 Beta: 0.069492 Total: 0.141616  
 # 41: 9(Ti) 17(C ) Alpha: 0.437763 Beta: 0.432822 Total: 0.870585

# 42: 9(Ti) 18(Si) Alpha: 0.063838 Beta: 0.063493 Total: 0.127332  
# 43: 9(Ti) 24(C ) Alpha: 0.298728 Beta: 0.293211 Total: 0.591938  
# 44: 9(Ti) 25(C ) Alpha: 0.282184 Beta: 0.286546 Total: 0.568730  
# 45: 9(Ti) 26(C ) Alpha: 0.291792 Beta: 0.293138 Total: 0.584930  
# 46: 9(Ti) 27(C ) Alpha: 0.293451 Beta: 0.294674 Total: 0.588125  
# 47: 9(Ti) 28(C ) Alpha: 0.290140 Beta: 0.290647 Total: 0.580787  
# 48: 9(Ti) 66(H ) Alpha: 0.046814 Beta: 0.046398 Total: 0.093212  
# 49: 9(Ti) 75(H ) Alpha: 0.043853 Beta: 0.044820 Total: 0.088673  
# 50: 10(C ) 11(C ) Alpha: 0.536370 Beta: 0.536535 Total: 1.072905  
# 51: 10(C ) 12(C ) Alpha: 0.575772 Beta: 0.567534 Total: 1.143306  
# 52: 10(C ) 13(C ) Alpha: 0.031833 Beta: 0.031540 Total: 0.063373  
# 53: 10(C ) 14(C ) Alpha: 0.032520 Beta: 0.032133 Total: 0.064652  
# 54: 10(C ) 17(C ) Alpha: 0.529523 Beta: 0.530340 Total: 1.059862  
# 55: 10(C ) 18(Si) Alpha: 0.037223 Beta: 0.037569 Total: 0.074792  
# 56: 11(C ) 12(C ) Alpha: 0.030922 Beta: 0.030818 Total: 0.061740  
# 57: 11(C ) 13(C ) Alpha: 0.027438 Beta: 0.027435 Total: 0.054872  
# 58: 11(C ) 17(C ) Alpha: 0.032126 Beta: 0.032117 Total: 0.064244  
# 59: 11(C ) 18(Si) Alpha: 0.025681 Beta: 0.025740 Total: 0.051421  
# 60: 11(C ) 87(H ) Alpha: 0.416954 Beta: 0.417019 Total: 0.833973  
# 61: 11(C ) 91(H ) Alpha: 0.439256 Beta: 0.439605 Total: 0.878861  
# 62: 11(C ) 95(H ) Alpha: 0.425491 Beta: 0.425505 Total: 0.850995  
# 63: 12(C ) 13(C ) Alpha: 0.535475 Beta: 0.534576 Total: 1.070051  
# 64: 12(C ) 14(C ) Alpha: 0.527667 Beta: 0.529224 Total: 1.056891  
# 65: 12(C ) 15(Si) Alpha: 0.035671 Beta: 0.036380 Total: 0.072051  
# 66: 12(C ) 17(C ) Alpha: 0.033679 Beta: 0.032792 Total: 0.066471  
# 67: 13(C ) 14(C ) Alpha: 0.031487 Beta: 0.031511 Total: 0.062998  
# 68: 13(C ) 73(H ) Alpha: 0.430506 Beta: 0.430611 Total: 0.861117  
# 69: 13(C ) 78(H ) Alpha: 0.415664 Beta: 0.415767 Total: 0.831431  
# 70: 13(C ) 79(H ) Alpha: 0.434503 Beta: 0.434623 Total: 0.869126

# 71: 14(C ) 15(Si) Alpha: 0.521752 Beta: 0.520487 Total: 1.042239  
# 72: 14(C ) 66(H ) Alpha: 0.381316 Beta: 0.382932 Total: 0.764248  
# 73: 15(Si) 16(C ) Alpha: 0.554940 Beta: 0.555036 Total: 1.109976  
# 74: 15(Si) 20(C ) Alpha: 0.557728 Beta: 0.557664 Total: 1.115392  
# 75: 15(Si) 21(C ) Alpha: 0.552711 Beta: 0.552743 Total: 1.105454  
# 76: 15(Si) 43(H ) Alpha: 0.037013 Beta: 0.037010 Total: 0.074023  
# 77: 15(Si) 45(H ) Alpha: 0.032420 Beta: 0.032408 Total: 0.064828  
# 78: 15(Si) 47(H ) Alpha: 0.035364 Beta: 0.035357 Total: 0.070721  
# 79: 15(Si) 48(H ) Alpha: 0.037829 Beta: 0.037847 Total: 0.075676  
# 80: 15(Si) 51(H ) Alpha: 0.037375 Beta: 0.037494 Total: 0.074868  
# 81: 15(Si) 54(H ) Alpha: 0.032617 Beta: 0.032619 Total: 0.065236  
# 82: 15(Si) 58(H ) Alpha: 0.033242 Beta: 0.033261 Total: 0.066503  
# 83: 15(Si) 61(H ) Alpha: 0.036825 Beta: 0.036843 Total: 0.073668  
# 84: 15(Si) 64(H ) Alpha: 0.034045 Beta: 0.034050 Total: 0.068094  
# 85: 15(Si) 66(H ) Alpha: 0.026709 Beta: 0.027007 Total: 0.053716  
# 86: 16(C ) 51(H ) Alpha: 0.446664 Beta: 0.446415 Total: 0.893079  
# 87: 16(C ) 61(H ) Alpha: 0.447033 Beta: 0.447017 Total: 0.894050  
# 88: 16(C ) 64(H ) Alpha: 0.446190 Beta: 0.446155 Total: 0.892344  
# 89: 17(C ) 18(Si) Alpha: 0.523552 Beta: 0.522361 Total: 1.045913  
# 90: 17(C ) 75(H ) Alpha: 0.383092 Beta: 0.383887 Total: 0.766980  
# 91: 18(Si) 19(C ) Alpha: 0.557906 Beta: 0.557907 Total: 1.115813  
# 92: 18(Si) 22(C ) Alpha: 0.557505 Beta: 0.557397 Total: 1.114902  
# 93: 18(Si) 23(C ) Alpha: 0.553566 Beta: 0.553513 Total: 1.107079  
# 94: 18(Si) 75(H ) Alpha: 0.026883 Beta: 0.027141 Total: 0.054024  
# 95: 18(Si) 76(H ) Alpha: 0.033633 Beta: 0.033623 Total: 0.067255  
# 96: 18(Si) 77(H ) Alpha: 0.037463 Beta: 0.037464 Total: 0.074927  
# 97: 18(Si) 84(H ) Alpha: 0.036856 Beta: 0.036857 Total: 0.073713  
# 98: 18(Si) 86(H ) Alpha: 0.033872 Beta: 0.033873 Total: 0.067745  
# 99: 18(Si) 93(H ) Alpha: 0.032408 Beta: 0.032405 Total: 0.064813

# 100: 18(Si) 94(H ) Alpha: 0.036521 Beta: 0.036496 Total: 0.073017  
# 101: 18(Si) 96(H ) Alpha: 0.037181 Beta: 0.037196 Total: 0.074377  
# 102: 18(Si) 100(H ) Alpha: 0.037435 Beta: 0.037557 Total: 0.074993  
# 103: 18(Si) 102(H ) Alpha: 0.034570 Beta: 0.034570 Total: 0.069140  
# 104: 19(C ) 96(H ) Alpha: 0.445518 Beta: 0.445504 Total: 0.891022  
# 105: 19(C ) 100(H ) Alpha: 0.447645 Beta: 0.447394 Total: 0.895039  
# 106: 19(C ) 102(H ) Alpha: 0.443922 Beta: 0.443908 Total: 0.887831  
# 107: 20(C ) 43(H ) Alpha: 0.448978 Beta: 0.448973 Total: 0.897951  
# 108: 20(C ) 45(H ) Alpha: 0.440651 Beta: 0.440666 Total: 0.881316  
# 109: 20(C ) 48(H ) Alpha: 0.446872 Beta: 0.446880 Total: 0.893752  
# 110: 21(C ) 47(H ) Alpha: 0.447201 Beta: 0.447193 Total: 0.894394  
# 111: 21(C ) 54(H ) Alpha: 0.439372 Beta: 0.439328 Total: 0.878699  
# 112: 21(C ) 58(H ) Alpha: 0.434791 Beta: 0.434824 Total: 0.869615  
# 113: 22(C ) 76(H ) Alpha: 0.445083 Beta: 0.445098 Total: 0.890181  
# 114: 22(C ) 77(H ) Alpha: 0.447495 Beta: 0.447509 Total: 0.895004  
# 115: 22(C ) 84(H ) Alpha: 0.448845 Beta: 0.448809 Total: 0.897654  
# 116: 23(C ) 86(H ) Alpha: 0.440971 Beta: 0.440962 Total: 0.881933  
# 117: 23(C ) 93(H ) Alpha: 0.436343 Beta: 0.436367 Total: 0.872710  
# 118: 23(C ) 94(H ) Alpha: 0.448048 Beta: 0.448084 Total: 0.896132  
# 119: 24(C ) 25(C ) Alpha: 0.581532 Beta: 0.588095 Total: 1.169627  
# 120: 24(C ) 26(C ) Alpha: 0.050608 Beta: 0.050840 Total: 0.101448  
# 121: 24(C ) 27(C ) Alpha: 0.049315 Beta: 0.051036 Total: 0.100352  
# 122: 24(C ) 28(C ) Alpha: 0.591358 Beta: 0.589978 Total: 1.181335  
# 123: 24(C ) 49(H ) Alpha: 0.423903 Beta: 0.423643 Total: 0.847545  
# 124: 25(C ) 26(C ) Alpha: 0.594442 Beta: 0.590825 Total: 1.185267  
# 125: 25(C ) 27(C ) Alpha: 0.053290 Beta: 0.050684 Total: 0.103974  
# 126: 25(C ) 28(C ) Alpha: 0.051854 Beta: 0.051989 Total: 0.103843  
# 127: 25(C ) 55(H ) Alpha: 0.433451 Beta: 0.432394 Total: 0.865846  
# 128: 26(C ) 27(C ) Alpha: 0.586516 Beta: 0.585847 Total: 1.172363

# 129: 26(C ) 28(C ) Alpha: 0.050118 Beta: 0.050629 Total: 0.100747  
 # 130: 26(C ) 65(H ) Alpha: 0.424134 Beta: 0.424229 Total: 0.848364  
 # 131: 27(C ) 28(C ) Alpha: 0.580031 Beta: 0.580224 Total: 1.160255  
 # 132: 27(C ) 69(H ) Alpha: 0.429342 Beta: 0.429190 Total: 0.858533  
 # 133: 28(C ) 59(H ) Alpha: 0.423168 Beta: 0.423255 Total: 0.846423  
 # 134: 29(C ) 30(C ) Alpha: 0.582602 Beta: 0.576710 Total: 1.159312  
 # 135: 29(C ) 31(C ) Alpha: 0.032259 Beta: 0.032066 Total: 0.064325  
 # 136: 29(C ) 34(C ) Alpha: 0.534551 Beta: 0.533683 Total: 1.068234  
 # 137: 29(C ) 35(C ) Alpha: 0.532484 Beta: 0.533590 Total: 1.066074  
 # 138: 29(C ) 36(Si) Alpha: 0.036935 Beta: 0.037556 Total: 0.074491  
 # 139: 29(C ) 38(C ) Alpha: 0.032117 Beta: 0.032096 Total: 0.064213  
 # 140: 30(C ) 31(C ) Alpha: 0.524778 Beta: 0.524452 Total: 1.049230  
 # 141: 30(C ) 32(Si) Alpha: 0.039209 Beta: 0.039515 Total: 0.078723  
 # 142: 30(C ) 34(C ) Alpha: 0.032060 Beta: 0.031940 Total: 0.064000  
 # 143: 30(C ) 35(C ) Alpha: 0.033118 Beta: 0.033085 Total: 0.066204  
 # 144: 30(C ) 38(C ) Alpha: 0.537504 Beta: 0.537662 Total: 1.075166  
 # 145: 31(C ) 32(Si) Alpha: 0.526211 Beta: 0.525928 Total: 1.052139  
 # 146: 31(C ) 38(C ) Alpha: 0.030357 Beta: 0.030386 Total: 0.060743  
 # 147: 31(C ) 81(H ) Alpha: 0.389539 Beta: 0.390169 Total: 0.779708  
 # 148: 32(Si) 33(C ) Alpha: 0.559738 Beta: 0.559685 Total: 1.119424  
 # 149: 32(Si) 38(C ) Alpha: 0.030806 Beta: 0.030910 Total: 0.061716  
 # 150: 32(Si) 41(C ) Alpha: 0.558414 Beta: 0.558403 Total: 1.116817  
 # 151: 32(Si) 42(C ) Alpha: 0.546437 Beta: 0.546406 Total: 1.092843  
 # 152: 32(Si) 81(H ) Alpha: 0.027418 Beta: 0.027722 Total: 0.055140  
 # 153: 32(Si) 83(H ) Alpha: 0.035605 Beta: 0.035611 Total: 0.071216  
 # 154: 32(Si) 85(H ) Alpha: 0.037516 Beta: 0.037525 Total: 0.075041  
 # 155: 32(Si) 88(H ) Alpha: 0.031450 Beta: 0.031481 Total: 0.062931  
 # 156: 32(Si) 90(H ) Alpha: 0.036751 Beta: 0.036858 Total: 0.073609  
 # 157: 32(Si) 97(H ) Alpha: 0.031405 Beta: 0.031377 Total: 0.062782

# 158: 32(Si) 98(H ) Alpha: 0.035852 Beta: 0.035881 Total: 0.071733  
# 159: 32(Si) 101(H ) Alpha: 0.034869 Beta: 0.034834 Total: 0.069703  
# 160: 32(Si) 103(H ) Alpha: 0.034235 Beta: 0.034222 Total: 0.068457  
# 161: 32(Si) 104(H ) Alpha: 0.037970 Beta: 0.037956 Total: 0.075926  
# 162: 33(C ) 98(H ) Alpha: 0.447879 Beta: 0.447873 Total: 0.895751  
# 163: 33(C ) 103(H ) Alpha: 0.440246 Beta: 0.440251 Total: 0.880497  
# 164: 33(C ) 104(H ) Alpha: 0.446780 Beta: 0.446797 Total: 0.893577  
# 165: 34(C ) 35(C ) Alpha: 0.031558 Beta: 0.031524 Total: 0.063082  
# 166: 34(C ) 36(Si) Alpha: 0.025025 Beta: 0.025111 Total: 0.050136  
# 167: 34(C ) 38(C ) Alpha: 0.030283 Beta: 0.030272 Total: 0.060555  
# 168: 34(C ) 53(H ) Alpha: 0.429177 Beta: 0.429246 Total: 0.858423  
# 169: 34(C ) 57(H ) Alpha: 0.434513 Beta: 0.434676 Total: 0.869189  
# 170: 34(C ) 62(H ) Alpha: 0.419416 Beta: 0.419823 Total: 0.839240  
# 171: 35(C ) 36(Si) Alpha: 0.524497 Beta: 0.523459 Total: 1.047956  
# 172: 35(C ) 72(H ) Alpha: 0.379877 Beta: 0.381353 Total: 0.761231  
# 173: 36(Si) 37(C ) Alpha: 0.560407 Beta: 0.560359 Total: 1.120767  
# 174: 36(Si) 39(C ) Alpha: 0.555878 Beta: 0.555937 Total: 1.111815  
# 175: 36(Si) 40(C ) Alpha: 0.555317 Beta: 0.555352 Total: 1.110669  
# 176: 36(Si) 44(H ) Alpha: 0.036904 Beta: 0.037030 Total: 0.073935  
# 177: 36(Si) 46(H ) Alpha: 0.034537 Beta: 0.034547 Total: 0.069084  
# 178: 36(Si) 50(H ) Alpha: 0.037798 Beta: 0.037814 Total: 0.075613  
# 179: 36(Si) 52(H ) Alpha: 0.036693 Beta: 0.036664 Total: 0.073357  
# 180: 36(Si) 56(H ) Alpha: 0.032557 Beta: 0.032587 Total: 0.065144  
# 181: 36(Si) 60(H ) Alpha: 0.037943 Beta: 0.037926 Total: 0.075869  
# 182: 36(Si) 63(H ) Alpha: 0.034123 Beta: 0.034107 Total: 0.068230  
# 183: 36(Si) 67(H ) Alpha: 0.036673 Beta: 0.036702 Total: 0.073374  
# 184: 36(Si) 70(H ) Alpha: 0.033381 Beta: 0.033370 Total: 0.066751  
# 185: 36(Si) 72(H ) Alpha: 0.026704 Beta: 0.027078 Total: 0.053782  
# 186: 37(C ) 60(H ) Alpha: 0.447338 Beta: 0.447359 Total: 0.894697



# 187: 37(C) 67(H) Alpha: 0.446226 Beta: 0.446217 Total: 0.892443  
# 188: 37(C) 70(H) Alpha: 0.437690 Beta: 0.437701 Total: 0.875390  
# 189: 38(C) 68(H) Alpha: 0.439837 Beta: 0.440186 Total: 0.880023  
# 190: 38(C) 71(H) Alpha: 0.414227 Beta: 0.414270 Total: 0.828496  
# 191: 38(C) 74(H) Alpha: 0.417780 Beta: 0.417742 Total: 0.835521  
# 192: 39(C) 44(H) Alpha: 0.448141 Beta: 0.447860 Total: 0.896001  
# 193: 39(C) 46(H) Alpha: 0.446046 Beta: 0.446022 Total: 0.892067  
# 194: 39(C) 50(H) Alpha: 0.446895 Beta: 0.446868 Total: 0.893763  
# 195: 40(C) 52(H) Alpha: 0.448354 Beta: 0.448379 Total: 0.896733  
# 196: 40(C) 56(H) Alpha: 0.436836 Beta: 0.436844 Total: 0.873680  
# 197: 40(C) 63(H) Alpha: 0.437931 Beta: 0.437910 Total: 0.875841  
# 198: 41(C) 83(H) Alpha: 0.443474 Beta: 0.443467 Total: 0.886941  
# 199: 41(C) 85(H) Alpha: 0.446763 Beta: 0.446743 Total: 0.893506  
# 200: 41(C) 90(H) Alpha: 0.448771 Beta: 0.448524 Total: 0.897294  
# 201: 42(C) 88(H) Alpha: 0.442012 Beta: 0.441986 Total: 0.883999  
# 202: 42(C) 97(H) Alpha: 0.431234 Beta: 0.431340 Total: 0.862574  
# 203: 42(C) 101(H) Alpha: 0.446769 Beta: 0.446790 Total: 0.893558
